1 **Chitinase 3-like-1 Contributes to Acetaminophen-induced Liver Injury by Promoting**  
2 **Hepatic Platelet Recruitment**

3  
4 Zhao Shan<sup>1,2</sup>, Leike Li<sup>3</sup>, Constance Lynn Atkins<sup>1</sup>, Meng Wang<sup>1</sup>, Yankai Wen<sup>1</sup>, Jongmin  
5 Jeong<sup>1</sup>, Nicolas F. Moreno<sup>1</sup>, Dechun Feng<sup>4</sup>, Xun Gui<sup>3</sup>, Ningyan Zhang<sup>3</sup>, Chun Geun  
6 Lee<sup>5</sup>, Jack Angel Elias<sup>5,6</sup>, William Lee<sup>7</sup>, Bin Gao<sup>4</sup>, Fong Wilson Lam<sup>8,9</sup>, Zhiqiang An<sup>3,\*</sup>,  
7 Cynthia Ju<sup>1,\*</sup>

- 8  
9 1. Department of Anesthesiology, UTHealth McGovern Medical School, Houston, TX, USA  
10 2. Center for Life Sciences, School of Life Sciences, Yunnan University, Kunming, Yunnan, China  
11 3. Texas Therapeutics Institute, UTHealth McGovern Medical School, Houston, TX, USA  
12 4. Laboratory of Liver Disease, National Institute on Alcohol Abuse and Alcoholism, NIH, Bethesda,  
13 MD, USA  
14 5. Molecular Microbiology and Immunology, Brown University, Providence, Rhode Island, New  
15 Haven, CT, USA  
16 6. Division of Medicine and Biological Sciences, Warren Alpert School of Medicine, Brown University,  
17 Providence, Rhode Island, New Haven, CT, USA  
18 7. Division of Digestive and Liver Diseases, Department of Internal Medicine, University of Texas  
19 Southwestern Med School, Dallas, TX, USA  
20 8. Division of Pediatric Critical Care Medicine, Baylor College of Medicine, Houston, TX, USA  
21 9. Center for Translation Research on Inflammatory Diseases, Michael E. DeBakey Veterans Affairs  
22 Medical Center, Houston, TX, USA

23  
24 The authors have declared that no conflict of interest exists.

25  
26 **Keywords:** Chi3l1, hepatic platelets, acetaminophen-induced liver injury, antibody therapy  
27  
28  
29  
30  
31  
32  
33  
34  
35  
36  
37  
38  
39  
40  
41  
42  
43  
44

---

\*Address correspondence to: Cynthia Ju, Ph.D Department of Anesthesiology, UTHealth McGovern Medical School. 6431 Fannin St, MSB6.432, Houston, TX 77030 Phone:(713)-500-7424 email: [changqing.ju@uth.tmc](mailto:changqing.ju@uth.tmc). Zhiqiang An, Ph.D. Texas Therapeutics Institute, UTHealth McGovern Medical School, Houston, TX, USA. Email: [zhiqiang.an@uth.tmc.edu](mailto:zhiqiang.an@uth.tmc.edu).

45 **Abstract**

46

47 Hepatic platelet accumulation contributes to acetaminophen (APAP)-induced liver injury (ALI).

48 However, little is known about the molecular pathways involved in platelet recruitment to the

49 liver and whether targeting such pathways could attenuate ALI. The present study unveiled a

50 critical role of chitinase 3-like-1 (Chi3l1) in hepatic platelet recruitment during ALI. Increased

51 Chi3l1 and platelets in the liver were observed in patients and mice overdosed with APAP.

52 Compared to wild-type (WT) mice, Chi3l1<sup>-/-</sup> mice developed attenuated ALI with markedly

53 reduced hepatic platelet accumulation. Mechanistic studies revealed that Chi3l1 signaled

54 through CD44 on macrophages to induce podoplanin expression, which mediated platelet

55 recruitment through C-type lectin-like receptor 2. Moreover, APAP treatment of CD44<sup>-/-</sup> mice

56 resulted in much lower numbers of hepatic platelets and liver injury than WT mice, a phenotype

57 similar to that in Chi3l1<sup>-/-</sup> mice. Recombinant Chi3l1 could restore hepatic platelet accumulation

58 and ALI in Chi3l1<sup>-/-</sup> mice, but not in CD44<sup>-/-</sup> mice. Importantly, we generated anti-Chi3l1

59 monoclonal antibodies and demonstrated that they could effectively inhibit hepatic platelet

60 accumulation and ALI. Overall, we uncovered the Chi3l1/CD44 axis as a critical pathway

61 mediating APAP-induced hepatic platelet recruitment and tissue injury. We demonstrated the

62 feasibility and potential of targeting Chi3l1 to treat ALI.

63

64

65

66

67

68

69

70

## 71 **Introduction**

72

73 Acute liver failure (ALF) is a life-threatening condition of massive hepatocyte injury and severe  
74 liver dysfunction that can result in multi-organ failure and death.[1] Acetaminophen (APAP)  
75 overdose is the leading cause of ALF in Europe and North America and responsible for more  
76 cases of ALF than all other aetiologies combined.[1, 2] It is estimated that each week, more  
77 than 50 million Americans use products containing APAP and approximately 30,000 patients are  
78 admitted to intensive care units every year due to APAP-induced liver injury (AILI).[1, 3]  
79 Although N-acetylcysteine (NAC) can prevent liver injury if given in time, there are still 30% of  
80 patients who do not respond to NAC.[4] Thus, identification of novel therapeutic targets and  
81 strategies is imperative.

82

83 APAP is metabolized predominantly by Cytochrome P450 2E1 (CYP2E1) to a reactive toxic  
84 metabolite, N-acetyl-p-benzoquinone imine (NAPQI). NAPQI causes mitochondrial dysfunction,  
85 lipid peroxidation and eventually cell death.[5] The initial direct toxicity of APAP triggers the  
86 cascades of coagulation and inflammation, contributing to the progression and exacerbation of  
87 AILI.[5] In patients with APAP overdose, the clinical observations of thrombocytopenia, reduced  
88 plasma fibrinogen levels, elevated thrombin-antithrombin, and increased levels of pro-  
89 coagulation microparticles strongly suggest concurrent coagulopathy.[6, 7] Similarly, APAP  
90 challenge in mice causes a rapid activation of the coagulation cascade and significant  
91 deposition of fibrin(ogen) in the liver.[8-10] With regard to the role of platelets in AILI, it is  
92 reported that in mice APAP-induced thrombocytopenia correlates with the accumulation of  
93 platelets in the liver and that platelet-depletion significantly attenuates AILI.[11] Two recent  
94 studies also demonstrate that persistent platelet accumulation in the liver delays tissue repair  
95 after AILI in mice.[10, 12] These findings strongly indicate that hepatic platelet accumulation is a

96 key mechanism contributing to AILI. However, little is known about the underlying molecular  
97 mechanism of APAP-induced hepatic platelet accumulation and whether targeting this process  
98 could attenuate AILI.

99

100 Chi3I1 (YKL-40 in humans) is a chitinase-like soluble protein without chitinase activities.[13] It is  
101 produced by multiple cell types, including macrophages, neutrophils, fibroblasts, synovial cells,  
102 endothelial cells, and tumor cells.[14, 15] Chi3I1 has been implicated in multiple biological  
103 processes including apoptosis, inflammation, oxidative stress, infection, and tumor  
104 metastasis.[16] Elevated serum levels of Chi3I1 have been observed in various liver diseases,  
105 such as hepatic fibrosis, non-alcoholic fatty liver, alcoholic liver disease, and hepatocellular  
106 carcinoma. [13, 17-19] However, the biological function of Chi3I1 in liver disease is not clear.  
107 Our previous study revealed an important role of Chi3I1 in promoting intrahepatic coagulation in  
108 concanavalin A-induced hepatitis.[20] Given the importance of intrahepatic coagulation in the  
109 mechanism of AILI, we wondered whether Chi3I1 is involved in platelets accumulation during  
110 AILI.

111

112 In the current study, we observed elevated levels of Chi3I1 in patients with APAP-induced acute  
113 liver failure and in mice challenged with APAP overdose. Our data demonstrated a central role  
114 of Chi3I1 in APAP-induced hepatic platelet recruitment through CD44. Importantly, we found  
115 that targeting Chi3I1 by monoclonal antibodies could effectively inhibit platelet accumulation in  
116 the liver and markedly attenuate AILI.

117

118 **Results**

119

120 **Chi3I1 is upregulated and plays a critical role in AILI.** Although elevated serum levels of  
121 Chi3I1 has been observed in chronic liver diseases,[13, 17-19] modulations of Chi3I1 levels  
122 during acute liver injury have not been reported. Our data demonstrated, for the first time, that  
123 compared with healthy individuals, patients with AILI displayed higher levels of Chi3I1 in the  
124 liver and serum (Figures 1A, B). Similarly, in mice treated with APAP, hepatic mRNA and serum  
125 protein levels of Chi3I1 were upregulated (Figures 1C, D). To determine the role of Chi3I1 in  
126 AILI, we treated wild-type (WT) mice and Chi3I1-knockout (Chi3I1<sup>-/-</sup>) mice with APAP. Compared  
127 with WT mice, serum ALT levels and the extent of liver necrosis were dramatically lower in  
128 Chi3I1<sup>-/-</sup> mice (Figures 1E, F). Moreover, administration of recombinant mouse Chi3I1 protein  
129 (rmChi3I1) to Chi3I1<sup>-/-</sup> mice enhanced liver injury to a similar degree observed in APAP-treated  
130 WT mice (Figures 1E, F). These data strongly suggest that Chi3I1 contributes to AILI.

131  
132 **Chi3I1 contributes to AILI by promoting hepatic platelet recruitment.** Thrombocytopenia is  
133 often observed in patients with APAP overdose.[6, 7, 21] We hypothesized that this  
134 phenomenon may be attributed to the recruitment of platelets into the liver. We performed  
135 immunohistochemical (IHC) staining of liver biopsies from patients with APAP-induced liver  
136 failure and found markedly increased numbers of platelets compared with normal liver tissues  
137 (Figure 2A). Similarly, in mice treated with APAP, a marked increase of platelets in the liver was  
138 observed by intravital microscopy (Figure 2B). It is reported that depletion of platelets prior to  
139 APAP treatment can prevent liver injury in mice.[11] Our data demonstrated that even after  
140 APAP treatment, depletion of platelets could still attenuate AILI (Figures 2C, D; Supplementary  
141 Figure 1). These data indicate a critical contribution of platelets to AILI. Given the role of Chi3I1  
142 in promoting intrahepatic coagulation in concanavalin A-induced hepatitis,[20] we hypothesized  
143 that Chi3I1 might be involved in platelet recruitment to the liver during AILI. To examine this  
144 hypothesis, we detected platelets in the liver by IHC using anti-CD41 antibody. Comparing with  
145 WT mice, we observed much fewer platelets in the liver after APAP treatment (Figure 2E).

146 Moreover, administration of rmChi3l1 to Chi3l1<sup>-/-</sup> mice restored hepatic platelet accumulation  
147 similar to APAP-treated WT mice (Figure 2E). These data suggest that Chi3l1 plays a critical  
148 role in promoting hepatic platelet accumulation, thereby contributing to AILI.

149 **Chi3l1 functions through its receptor CD44.** To further understand how Chi3l1 is involved in  
150 platelet recruitment, we set out to identify its receptor. We isolated non-parenchymal cells  
151 (NPCs) from WT mice at 3h after APAP treatment and incubated the cells with His-tagged  
152 rmChi3l1. The cell lysate was subjected to immunoprecipitation using an anti-His antibody. The  
153 “pulled down” fraction was subjected to LC/MS analyses, and a partial list of proteins identified  
154 is shown in Supplementary Table 1. Among the potential binding proteins, we decide to further  
155 investigate CD44, which is a cell surface receptor expressed on diverse mammalian cell types,  
156 including endothelial cells, epithelial cells, fibroblasts, keratinocytes and leukocytes.[22]  
157 Immunoprecipitation experiments using liver homogenates from APAP-treated WT and CD44<sup>-/-</sup>  
158 mice demonstrated that the anti-CD44 antibody could “pull down” Chi3l1 from WT but not CD44<sup>-/-</sup>  
159 liver homogenates (Figure 3A). Supporting this finding, interferometry measurements using  
160 recombinant human Chi3l1 (rhChi3l1) revealed a direct interaction between Chi3l1 and CD44  
161 (Kd = 251nM, Figure 3B). Moreover, we incubated rhChi3l1 with human CD44 and then  
162 performed immunoprecipitation with an anti-CD44 antibody. Data shown in Figure 3C confirmed  
163 that Chi3l1 directly binds to CD44. Together, these results suggest that CD44 is a receptor for  
164 Chi3l1.

165  
166 To investigate the role of CD44 in mediating the function of Chi3l1, we treated CD44<sup>-/-</sup> mice with  
167 rmChi3l1 simultaneously with APAP challenge. We found that rmChi3l1 had no effect on platelet  
168 recruitment or AILI in CD44<sup>-/-</sup> mice (Figures 3D-F). This is in stark contrast to restoring platelet  
169 accumulation and increasing AILI by rmChi3l1 treatment in Chi3l1<sup>-/-</sup> mice (Figure 1E, F; 2E).  
170 However, these effects of rmChi3l1 in Chi3l1<sup>-/-</sup> mice were abrogated when CD44 was blocked  
171 by using an anti-CD44 antibody (Supplementary Figures 2A-C). Together, these data

172 demonstrate a critical role of CD44 in mediating Chi3l1-induced hepatic platelet accumulation  
173 and AILI.

174

175 CYP2E1-mediated APAP bio-activation to form N-acetyl para quinoneimine (NAPQI) and the  
176 detoxification of NAPQI by glutathione (GSH) are important in determining the degrees of AILI.[5]  
177 Although unlikely, there is a possibility that the phenotypes observed in Chi3l1<sup>-/-</sup> and CD44<sup>-/-</sup>  
178 mice were due to the effects of gene deletion on APAP bio-activation. To address this concern,  
179 we compared the levels of GSH, liver CYP2E1 protein expression, and NAPQI-protein adducts  
180 among WT, Chi3l1<sup>-/-</sup> and CD44<sup>-/-</sup> mice (Supplementary Figures 3A-C). However, we did not  
181 observe any difference, suggesting that Chi3l1 or CD44 deletion does not affect APAP bio-  
182 activation and its direct toxicity to hepatocytes.

183

184 **Hepatic Mφs promote platelet recruitment.** To further identify the cell type on which Chi3l1  
185 binds to CD44, we incubated liver NPCs with His-tagged rmChi3l1. We found that almost all  
186 CD44<sup>+</sup>Chi3l1<sup>+</sup> cells were F4/80<sup>+</sup> Mφs (Supplemental Figure 2D). This finding suggested the  
187 possible involvement of hepatic Mφs in platelet recruitment. We performed IHC staining of liver  
188 biopsies from AILI patients and observed co-localization of Mφs (CD68<sup>+</sup>) and platelets (CD41<sup>+</sup>)  
189 (Figure 4A). In the livers of APAP-treated mice, adherence of platelets to Mφs was also  
190 observed by IHC (Figure 4B) and intravital microscopy (Figure 2B). Quantification of the staining  
191 confirmed that there were higher numbers of platelets adherent to Mφs than to LSECs after  
192 APAP challenge (Figure 4B).

193 To further investigate the role of hepatic Mφs in platelet recruitment during AILI, we performed  
194 Mφ-depletion experiments using liposome-encapsulated clodronate (CLDN). We first followed a  
195 previously published protocol[23-25]and injected CLDN around 40hrs prior to APAP treatment  
196 (Figure 4C, "Previous Strategy"). We examined the efficiency of Mφ-depletion by flow cytometry  
197 analysis, which can distinguish resident Kupffer cells (KCs, CD11b<sup>low</sup>F4/80<sup>+</sup>) from infiltrating

198 M $\phi$ s (IMs, CD11b<sup>hi</sup>F4/80<sup>+</sup>).[26] We found that compared with control mice treated with empty  
199 liposomes, there were actually more M $\phi$ s, consisted of mainly IMs, in the liver of CLDN-treated  
200 mice (Figure 4C). Consistent with the increase of M $\phi$ s, there were also higher numbers of  
201 platelets in the liver of CLDN-treated mice (Figure 4C). These findings suggest that although  
202 KCs are depleted using the “Previous Strategy”, the treatment of CLDN induces the recruitment  
203 of IMs, resulting in higher numbers of M $\phi$ s in the liver at the time of APAP treatment. As  
204 reported, this treatment strategy resulted in exacerbated AILI (Fig. 4E, F “Previous Strategy”),  
205 which had led to the conclusion in published reports that KCs play a protective role against  
206 AILI.[23-25] However, alternatively the enhanced injury could be due to increased IMs and  
207 platelet accumulation.

208  
209 To better investigate the role of hepatic M $\phi$ s in platelet recruitment, we set out to identify a time  
210 period in which both KCs and IMs are absent after CLDN treatment. We measured hepatic M $\phi$ s  
211 by flow cytometry at various times after CLDN treatment and established a “New Strategy”, in  
212 which mice were injected with CLDN and after 9hrs treated with APAP. As shown in Fig. 4D, at  
213 6hrs after APAP challenge (15hrs after CLDN), both KCs and IMs were dramatically reduced.  
214 Interestingly, when compared to control mice treated with empty liposomes, CLDN-treated mice  
215 developed markedly reduced liver injury with nearly no platelet accumulation in the liver (Figures  
216 4D-F “New Strategy”). These data suggest that hepatic M $\phi$ s play a crucial role in platelet  
217 recruitment into the liver, thereby contributing to AILI.

218  
219 **Chi311/CD44 signaling in M $\phi$ s upregulates podoplanin expression and platelet adhesion.**

220 To further understand how Chi311/CD44 signaling in M $\phi$ s promotes platelet recruitment, we  
221 measured M $\phi$ s expression of a panel of adhesion molecules known to be important in platelet  
222 recruitment.[27-30] Our data showed that podoplanin is expressed at a much higher level in  
223 hepatic M $\phi$ s isolated from APAP-treated WT mice than those from Chi311<sup>-/-</sup> or CD44<sup>-/-</sup> mice



224 (Figure 5A). Interestingly, rmChi3l1 treatment of Chi3l1<sup>-/-</sup>, but not CD44<sup>-/-</sup> mice, markedly  
225 increased the podoplanin mRNA and protein expression levels in Mφs (Figures 5B, C). To  
226 examine the role of podoplanin in mediating platelet adhesion to Mφs, we blocked podoplanin  
227 using an anti-podoplanin antibody in Chi3l1<sup>-/-</sup> mice reconstituted with rmChi3l1. As shown in  
228 Figures 5D-F, blockade of podoplanin not only abrogated rmChi3l1-mediated platelet  
229 recruitment into the liver, but also significantly reduced its effect on increasing AILI in Chi3l1<sup>-/-</sup>  
230 mice.

231  
232 C-type lectin-like receptor 2 (Clec-2) is the only platelet receptor known to bind podoplanin[31].  
233 To further elucidate the role of podoplanin in mediating platelet adhesion to Mφs, we isolated  
234 Mφs from WT mice treated with APAP. After treating Mφs with anti-podoplanin antibody or IgG  
235 as control, we added platelets. Immunofluorescence staining of podoplanin and Clec-2 showed  
236 that the Clec-2-expressing platelets only bound to IgG-treated, but not anti-podoplanin-treated  
237 Mφs (Supplementary Figure 4). Together, our data demonstrate that Mφs recruit platelets  
238 through podoplanin and Clec-2 interaction, and that the podoplanin expression on Mφs is  
239 regulated by Chi3l1/CD44 signaling.

240  
241 **Evaluation of the therapeutic potential of targeting Chi3l1 in the treatment of AILI.**

242 Although NAC greatly reduces morbidity and mortality from ALF due to APAP overdose, the  
243 death rate and need for liver transplantation remain unacceptably high. While elucidating the  
244 underlying biology of Chi3l1 in AILI, we also generated monoclonal antibodies specifically  
245 recognizing either mouse or human Chi3l1. We screened a panel of anti-mouse Chi3l1  
246 monoclonal antibodies (α-mChi3l1 mAb) to determine their efficacies in attenuating AILI. We  
247 injected WT mice with an α-mChi3l1 mAb or IgG at 3h after APAP challenge. Our data showed  
248 that clone 59 (C59) had the most potent effects on inhibiting APAP-induced hepatic platelet  
249 accumulation and attenuating AILI (Figures 6A-C).

250

251 To evaluate the potential of targeting Chi3l1 as a treatment for ALI in humans, we screened all  
252 of the  $\alpha$ -hChi3l1 mAb we generated by IHC staining of patients' liver biopsies (data not shown)  
253 and selected the best clone for *in vivo* functional studies. Because the amino acid sequence  
254 homology between human and mouse Chi3l1 is quite high (76%), we treated Chi3l1<sup>-/-</sup> mice with  
255 rhChi3l1. We found that rhChi3l1 was as effective as rmChi3l1 in promoting platelet recruitment  
256 and increasing ALI in Chi3l1<sup>-/-</sup> mice (Figures 6D-F). To our excitement, the  $\alpha$ -hChi3l1 mAb  
257 treatment could abrogate platelet recruitment and dramatically reduce liver injury (Figures 6D-F).  
258 Together, these data indicate that monoclonal antibody-based blocking of Chi3l1 may be an  
259 effective therapeutic strategy to treat ALI, and potentially other acute liver injuries.

260

## 261 **Discussion**

262

263 The current study unveiled an important function of Chi3l1 in promoting platelet recruitment into  
264 the liver after APAP overdose, thereby playing a critical role in exacerbating APAP-induced  
265 coagulopathy and liver injury. Our data demonstrate that Chi3l1 signals through CD44 on M $\phi$ s  
266 to upregulate podoplanin expression and promote platelet recruitment (Figure 7). Moreover, we  
267 report for the first time significant hepatic accumulation of platelets and marked upregulation of  
268 Chi3l1 in patients with ALF caused by APAP overdose. Importantly, we demonstrate that  
269 neutralizing Chi3l1 with monoclonal antibodies can effectively inhibit hepatic platelet  
270 accumulation and mitigate liver injury caused by APAP, supporting the potential and feasibility  
271 of targeting Chi3l1 as a therapeutic strategy to treat ALI.

272

273 The elevation of serum levels of Chi3l1 has been observed in various liver diseases, [13, 17-19]  
274 but studies of its involvement in liver diseases have only begun to emerge. There are several  
275 reports describing a role of Chi3l1 in models of chronic liver injuries caused by alcohol, CCl<sub>4</sub> or

276 high-fat diet. [32-35] However, the molecular and cellular mechanisms accounting for the  
277 involvement of Chi3l1 have yet to be defined. The present study unveils a function of Chi3l1 in  
278 promoting platelet recruitment to the liver during acute injury. We provide compelling data  
279 demonstrating that Chi3l1, acting through its receptor CD44 on M $\phi$ s to recruit platelets, thereby  
280 contributing to AILI. Multiple receptors of Chi3l1 have been identified, including IL-13R $\alpha$ 2,  
281 CRTH2, TMEM219, and galectin-3. [36-40] The fact that Chi3l1 could bind to multiple receptors  
282 is consistent with a diverse involvement of Chi3l1 under different disease contexts. A recent  
283 study showed that Chi3l1 was upregulated during gastric cancer (GC) development and that  
284 through binding to CD44, it activated Erk, Akt, and  $\beta$ -catenin signaling, thereby enhancing GC  
285 metastasis. [39] Our studies illustrated a novel role of Chi3l1/CD44 interaction in the  
286 recruitment of hepatic platelets and contribution to AILI. Our in vivo studies using CD44<sup>-/-</sup> mice  
287 and anti-CD44 antibody provide strong evidence that CD44 mediates the effects of Chi3l1. Our  
288 observation that Chi3l1 predominantly binds to CD44 on M $\phi$ s, but not other CD44-expressing  
289 cells in the liver, suggests two possibilities which warrant further investigation. First, Chi3l1 may  
290 bind a specific isoform of CD44 that is uniquely expressed by M $\phi$ s. Second, the Chi3l1-CD44  
291 interaction requires binding of a co-receptor, which is expressed on M $\phi$ s but not on other CD44-  
292 expressing cells in the liver.

293

294 We identified hepatic M $\phi$ s as a key player in promoting platelet recruitment to the liver during  
295 AILI. Given the involvement of platelets in AILI, this finding would suggest that hepatic M $\phi$ s also  
296 contribute to liver injury. The role of hepatic M $\phi$ s in AILI has been a topic of debate and the  
297 current understanding is confined by the limitation of the methods used to deplete these cells.  
298 [23-25, 41, 42] Several previous studies using CLDN to deplete M $\phi$ s concluded that these cells  
299 play a protective role against AILI. [23-25] However, in those studies, M $\phi$ -depletion was  
300 confirmed by IHC staining of F4/80, which cannot distinguish KCs from IMs. Our laboratory and  
301 others had since developed a flow cytometric approach to detect and distinguish the two M $\phi$ s

302 populations. Using flow cytometry to monitor M $\phi$ -depletion, we found that the timing of CLDN  
303 treatment was critical. In the previously published reports, mice were treated with CLDN around  
304 2 days before APAP challenge. [23-25] Using this treatment regimen, IMs became abundant  
305 prior to APAP treatment, even though KCs were depleted. Without this knowledge, previous  
306 studies attributed the worsened AILI to the depletion of KCs. However, the advancement of  
307 knowledge on the recruitment of IMs and their contribution to acute liver injury offers an  
308 alternative interpretation that the worsened AILI is due to IM accumulation.[12, 26, 43, 44] In the  
309 current study, we analyzed KCs and IMs in the liver at various time points after CLDN treatment  
310 to identify a new strategy to achieve more complete hepatic M $\phi$ -depletion. Our data  
311 demonstrated that when both M $\phi$ s populations were absent at the time of APAP treatment,  
312 platelet recruitment was abrogated and AILI was significantly reduced. During the preparation  
313 of this manuscript, a study was published describing that IMs could recruit platelets.[12]  
314 Together, these data suggest that hepatic M $\phi$ s (both KCs and IMs) play a crucial role in  
315 promoting hepatic platelet accumulation, thereby contributing to AILI.

316

317 Our data suggest that platelet-derived Clec-2 interacts with podoplanin expressed on M $\phi$ s,  
318 resulting in platelet recruitment to the liver during the early phase of AILI. The role of  
319 podoplanin/Clec-2 interaction in platelet recruitment and thromboinflammation has been  
320 indicated in multiple inflammatory and infectious conditions.[12, 30, 31] Our data, for the first  
321 time, provide evidence that the podoplanin expression on M $\phi$ s is regulated by the Chi3l1/CD44  
322 axis. Future studies focusing on gaining molecular insight into such regulation are warranted. An  
323 increasing number of studies suggest that platelets play an important, but paradoxical role in  
324 liver injury. It has been proposed that they contribute to tissue damage during injury phase but  
325 promote tissue repair at later time points.[45] However, two recent studies of AILI demonstrate  
326 that persistent platelet accumulation in the liver significantly delays liver repair. One study  
327 described a podoplanin/Clec-2 interaction between platelets and hepatic IMs during tissue

328 repair, and demonstrated a detrimental role of such interaction through blocking the recruitment  
329 of reparative neutrophils.[12] Another study showed that AILI was associated with elevated  
330 plasma levels of von Willebrand Factor (vWF), which prolonged hepatic platelet accumulation  
331 and delayed repair of APAP-injured liver in mice.[10] These studies together with our finding  
332 that platelets drive tissue damage during early stage of AILI suggest that platelets may be a  
333 therapeutic target to treat acute liver injury.

334

335 Our studies uncovered a previously unrecognized involvement of the Chi3l1/CD44 axis in AILI  
336 and provided insights into the mechanism by which Chi3l1/CD44 signaling promotes hepatic  
337 platelet accumulation and liver injury after APAP challenge. Taking our findings one-step further  
338 toward clinical application, we demonstrated the feasibility of targeting Chi3l1 by mAbs to  
339 attenuate AILI. There is an unmet need for developing treatments for AILI, as NAC is the only  
340 antidote at present. However, the efficacy of NAC declines rapidly when initiated more than a  
341 few hours after APAP overdose, long before patients are admitted to the clinic with symptoms of  
342 severe liver injury.[46] Our studies provide strong support for the potential targeting of Chi3l1 as  
343 a novel therapeutic strategy to improve the clinical outcomes of AILI and perhaps other acute  
344 liver injury conditions.

345

## 346 **Methods**

347

348 **Animal experiments and procedures.** C57BL/6J and CD44<sup>-/-</sup> mice were purchased from the  
349 Jackson Laboratory. Chi3l1<sup>-/-</sup> mice were provided by Dr. Jack Elias (Brown University,  
350 Providence, RI, United States). All mouse colonies were maintained at the animal core facility of  
351 University of Texas Health Science Center (UTHealth). C57BL/6J, not C57BL/6N, was used as  
352 WT control because both Chi3l1<sup>-/-</sup> and CD44<sup>-/-</sup> mice are on the C57BL/6J background,  
353 determined by PCR (data not shown). Animal studies described have been approved by the

354 UTHealth Institutional Animal Care and Use Committee (IACUC). For APAP treatment, mice (8-  
355 12 weeks old) were fasted overnight (5:00pm to 9:00am) before *i.p.* injected with APAP (Sigma,  
356 A7085) at a dose of 210 mg/kg for male mice and 325 mg/kg for female mice, as female mice  
357 are less susceptible to APAP-induced liver injury.[47] Male mice have been the choice in the  
358 vast majority of the studies of AILI reported in the literature.[8, 24] Therefore, we used male  
359 mice in the majority of the experiments presented. However, we observed a similar phenotype  
360 in female  $\text{Chi3l1}^{-/-}$  and  $\text{CD44}^{-/-}$  mice as in male mice (Supplementary Figure 5). In some  
361 experiments, APAP-treated mice were immediately injected intraperitoneally (*i.p.*) with either  
362 PBS (100 $\mu$ l) or recombinant mouse Chi3l1 (rmChi3l1, 500 ng/mouse in 100 $\mu$ l, Sino Biological  
363 50929-M08H). Livers were harvested at time points indicated in the figure legends and  
364 immunofluorescence (IF) staining was performed using frozen sections to detect M $\phi$ s and  
365 platelets using anti-F4/80 and anti-CD41 antibodies, respectively. Liver paraffin sections and  
366 sera were harvested at time points indicated in the figure legends. H&E staining and ALT  
367 measurement to examine liver injury were performed using a diagnostic assay kit (Teco  
368 Dignostics, Anaheim CA).

369  
370 *Blocking endogenous podoplanin:* Mice were *i.v.* injected with Ctrl IgG (Bioxcell InvivoMab,  
371 BE0087, 100 $\mu$ g/mouse) or anti-podoplanin antibody (Bioxcell InvivoMab, BE0236, 100 $\mu$ g/mouse)  
372 in  $\text{Chi3l1}^{-/-}$  reconstituted with rmChi3l1 at 16h prior to APAP treatment.

373  
374 *Platelet depletion:* WT mice were *i.v.* injected with Ctrl IgG (BD Pharmingen, 553922, 2mg/kg)  
375 or CD41 antibody (BD Pharmingen, 553847, 2mg/kg) to deplete platelets at 12h prior to APAP  
376 treatment.

377  
378 *KCs depletion:* WT mice were *i.v.* injected with empty liposomes (PBS, 100 $\mu$ l/mouse) or  
379 clodronate-containing liposomes (CLDN, 100 $\mu$ l/mouse) to deplete KCs at either 9hrs or 40hrs

380 prior to APAP treatment. Clodronate-containing liposomes were generated as previously  
381 described[24].

382

383 *Evaluation of the effects of anti-Chi3l1 monoclonal antibodies:* To examine the therapeutic  
384 potential of anti-mouse Chi3l1 mAbs, WT mice were injected (*i.p.*) with either Ctrl IgG or anti-  
385 mouse Chi3l1 antibody clones 3h after APAP administration. To examine the therapeutic  
386 potential of anti-human Chi3l1 mAbs, Chi3l1<sup>-/-</sup> mice treated with APAP were immediately  
387 injected (*i.p.*) with either PBS (100µl) or recombinant human Chi3l1 (rhChi3l1, 1µg/mouse in  
388 100µl, Sino Biological 11227-H08H). After 3h, these mice were divided into two groups injected  
389 (*i.p.*) with either Ctrl IgG or anti-human Chi3l1 mAbs.

390

391 **Bio-layer interferometry.** The binding affinity between Fc-CD44 and His-Chi3l1 was measured  
392 using the Octet system 8-channel Red96 (Menlo Park). Protein A biosensors and kinetics buffer  
393 were purchased from Pall Life Sciences (Menlo Park). Fc-CD44 protein was immobilized onto  
394 Protein A biosensors and incubated with varying concentrations of recombinant His-Chi3l1 in  
395 solution (1000 nM to 1.4 nM). Binding kinetic constants were determined using 1:1 fitting model  
396 with ForteBio's data analysis software 7.0, and the KD was calculated using the ratio Kdis/Kon  
397 (the highest 4 concentrations were used to calculate the KD.).

398

399 **Immunohistochemical (IHC) and immunofluorescent (IF).** H&E staining and IHC were  
400 performed on paraffin sections using the following antibodies: anti-human CD41 (Proteintech,  
401 24552-2-AP, 1:200), anti-human CD68 (Thermo Fisher, MA5-13324, 1:100), anti-human Chi3l1  
402 (Proteintech, 12036-1-AP, 1:100), and anti-mouse F4/80 (Bio Rad, MCA497R, 1:200). IF  
403 staining was performed on frozen sections using the following antibodies: anti-mouse CD41 (BD  
404 Bioscience, Clone MWRReg 30), mouse F4/80 (Biolegend, 123122, 1:100), anti-CD44 (abcam,  
405 clone KM81, ab112178, 1:200), anti-Chi3l1 (Proteintech, 12036-1-AP, 1:100), anti-Podoplanin

406 (Novus, biological, NB600-1015, 1:100), and anti-Clec-2 (Biorbyt, orb312182, 1:100). Alexa  
407 488-conjugated donkey anti-rat immunoglobulin (Invitrogen, A-21208, 1:1000) was used as a  
408 secondary antibody for CD41 and CD44 detection. Alexa 488-conjugated goat anti-rabbit  
409 immunoglobulin (Invitrogen, A-11034, 1:1000) was used as a secondary antibody for Clec-2  
410 detection. Alexa 594-conjugated goat anti-rabbit immunoglobulin (Invitrogen, A-11012, 1:1000)  
411 was used as a secondary antibody for Chi3l1 detection. Alexa 594-conjugated goat anti-hamster  
412 immunoglobulin (Invitrogen, A-21113, 1:1000) was used as a secondary antibody for  
413 Podoplanin detection. Nuclei were detected by Hoechst (Invitrogen, H3570, 1:10000).

414

415 **Intravital confocal microscopy.** Mice were prepared for intravital microscopy as previously  
416 described.[48] Briefly, mice were anesthetized using pentobarbital and underwent tracheostomy  
417 (to facilitate breathing) and internal jugular catheterization (for antibody administration) followed  
418 by liver exteriorization as described by Marques et al,[49] with modifications. Mice were placed  
419 supine on a custom-made stage with the liver overlying a glass coverslip wetted with warmed  
420 saline and surrounded with wet saline-soaked gauze. Mice were kept euthermic at 37°C using  
421 radiant warmers and monitored with a rectal thermometer. Anesthesia was maintained using an  
422 isoflurane delivery device (RoVent with SomnoSuite; Kent Scientific) with 1-3% isoflurane  
423 delivered. Mice were intravenously injected with an antibody mixture in sterile 0.9% sodium  
424 chloride containing TRITC/bovine serum albumin (Sigma; to label the vasculature; 500  
425 µg/mouse), BV421-anti-F4/80 antibody (to label Kupffer; 0.75 µg/mouse), and DyLight 649/anti-  
426 GPIIb/IIIa antibody (emfret analytics; to label platelets; 3 µg/mouse) for visualization. Mice were  
427 imaged on an Olympus FV3000RS laser scanning confocal inverted microscope system at 30  
428 fps using a 60X/NA1.30 silicone oil objective with 1X and 3X optical zoom using the resonance  
429 scanner. This allows for simultaneous excitation and detection of up to four wavelengths. All  
430 animals were euthanized under a surgical plane of anesthesia at the end of the experiments.

431



432 **Image analysis of intravital microscopy experiments.** The images were then analyzed by a  
433 blinded investigator to assess platelet area. Eleven to fifteen 1-minute fields of view (1X optical  
434 zoom) were analyzed per mouse using FIJI/ImageJ software. Background noise was removed  
435 using a Guassian filter (1 pixel) for all channels prior to analysis. Vascular area was measured  
436 in each field using the region of interest (ROI) selection brush in the TRITC (albumin) channel.  
437 The platelet area within the vascular ROI was then determined using threshold of the DyLight  
438 649 (platelet) channel.

439  
440 **Generation of Chi3I1 mAbs.** Rabbit monoclonal antibodies were generated using previously  
441 reported methods.[50] Briefly, two New Zealand white rabbits were immunized subcutaneously  
442 with 0.5 mg recombinantly expressed human Chi3I1 protein (Sino Biological, Cat: 11227-H08H).  
443 After the initial immunization, animals were given boosters three times in a three-week interval.  
444 Serum titers were evaluated by indirect enzyme-linked immunosorbent assay (ELISA) and  
445 rabbit peripheral blood mononuclear cells (PBMC) were isolated after the final immunization. A  
446 large panel of single memory B cells were enriched from the PBMC and cultured for two weeks,  
447 and the supernatants were analyzed by ELISA. To isolate mouse Chi3I1 antibody, the rabbits  
448 were boosted twice more with mouse Chi3I1 before the memory B cell culture. The variable  
449 region genes of the antibodies from these positive single B cells were recovered by reverse  
450 transcription PCR (RT-PCR) and cloned into the mammalian cell expression vector as  
451 described previously.[50] Both the heavy and light chain constructs were co-transfected into  
452 Expi293 cell lines using transfection reagent PEI (Sigma). After 7 days of expression,  
453 supernatants were harvested and antibodies were purified by affinity chromatography using  
454 protein A resin as reported before.[50]

455  
456 **Statistics.** Data were presented as mean  $\pm$  SEM unless otherwise stated. Statistical analyses  
457 were carried out using GraphPad Prism (GraphPad Software). Comparisons between two

458 groups were carried out using unpaired Student t test. Comparisons among multiple groups  
459 ( $n \geq 3$ ) were carried out using one-way ANOVA. P values are as labeled and less than 0.05 was  
460 considered significant. Platelets counts/mm<sup>2</sup> was analyzed by Image J software.

461

462 **Study approval.** Serum samples from patients diagnosed with APAP-induced liver failure on  
463 day 1 of admission were obtained from the biobank of the Acute Liver Failure Study Group  
464 (ALFSG) at UT Southwestern Medical Center, Dallas, TX, USA. The study was designed and  
465 carried out in accordance with the principles of ALFSG and approved by the Ethics Committee  
466 of ALFSG (HSC-MC-19-0084). Formalin-fixed, paraffin-embedded human liver biopsies from  
467 patients diagnosed with APAP-induced liver failure were obtained from the National Institutes of  
468 Health-funded Liver Tissue Cell Distribution System at the University of Minnesota, which was  
469 funded by NIH contract # HHSN276201200017C.

470

471 See Supplementary Material for details for other methods.

472

### 473 **Author contributions**

474 ZS designed and conducted the experiments, analyzed/interpreted the data, and wrote the  
475 manuscript; LL generated anti-human/mouse Chi3l1 antibodies; CLA conducted experiments  
476 and analyzed data; XG performed the interferometry assay; FWL conducted the intravital  
477 microscopy experiments; DCF and BG provided slides of healthy individuals and patients with  
478 ALLI; LW provided patients' serum samples; BG, YW, JJ, NFM and ZQA revised manuscript and  
479 provided suggestions; CGL and JAE provided Chi3l1<sup>-/-</sup> mice; ZQA and NYZ supervised the  
480 generation of anti-human/mouse Chi3l1 antibodies; CJ conceived and supervised the project  
481 and wrote the manuscript.

482

### 483 **Acknowledgements**

484 We appreciate the time and effort from Dr. Yanyu Wang (Department of Anesthesiology,  
485 UTHealth), who diligently double-checked the raw data for each figure. ZS received funding  
486 from NSFC (32071129). FWL received funding from NIH (GM123261). ZA received funding  
487 from CPRIT (RP150551 and RP190561) and the Welch Foundation (AU-0042-20030616). C.J.  
488 received funding from NIH (DK122708, DK109574, DK121330, and DK122796) and support  
489 from a University of Texas System Translational STARs award. Portions of this work was  
490 supported with resources and the use of facilities of the Michael E. DeBakey VA Medical Center  
491 and funding from Department of Veterans Affairs I01 BX002551 (Equipment, Personnel,  
492 Supplies). The contents do not represent the views of the U.S. Department of Veterans Affairs  
493 or the United States Government.

494  
495 **References:**

- 496
- 497 [1] W. Bernal and J. Wendon, "Acute liver failure," *N Engl J Med*, vol. 369, no. 26, pp.  
498 2525-34, Dec 26 2013.
- 499 [2] H. Jaeschke, "Acetaminophen: Dose-Dependent Drug Hepatotoxicity and Acute  
500 Liver Failure in Patients," *Dig Dis*, vol. 33, no. 4, pp. 464-71, 2015.
- 501 [3] M. Blieden, L. C. Paramore, D. Shah, and R. Ben-Joseph, "A perspective on the  
502 epidemiology of acetaminophen exposure and toxicity in the United States,"  
503 *Expert Rev Clin Pharmacol*, vol. 7, no. 3, pp. 341-8, May 2014.
- 504 [4] E. S. Fisher and S. C. Curry, "Evaluation and treatment of acetaminophen  
505 toxicity," *Adv Pharmacol*, vol. 85, pp. 263-272, 2019.
- 506 [5] J. A. Hinson, A. B. Reid, S. S. McCullough, and L. P. James, "Acetaminophen-  
507 induced hepatotoxicity: role of metabolic activation, reactive oxygen/nitrogen

- 508 species, and mitochondrial permeability transition," *Drug Metab Rev*, vol. 36, no.  
509 3-4, pp. 805-22, Oct 2004.
- 510 [6] R. T. Stravitz *et al.*, "Role of procoagulant microparticles in mediating  
511 complications and outcome of acute liver injury/acute liver failure," *Hepatology*,  
512 vol. 58, no. 1, pp. 304-13, Jul 2013.
- 513 [7] R. T. Stravitz *et al.*, "Thrombocytopenia Is Associated With Multi-organ System  
514 Failure in Patients With Acute Liver Failure," *Clin Gastroenterol Hepatol*, vol. 14,  
515 no. 4, pp. 613-620 e4, Apr 2016.
- 516 [8] B. P. Sullivan, K. M. Kassel, A. Jone, M. J. Flick, and J. P. Luyendyk,  
517 "Fibrin(ogen)-independent role of plasminogen activators in acetaminophen-  
518 induced liver injury," *Am J Pathol*, vol. 180, no. 6, pp. 2321-9, Jun 2012.
- 519 [9] B. P. Sullivan *et al.*, "Hepatocyte tissue factor activates the coagulation cascade  
520 in mice," *Blood*, vol. 121, no. 10, pp. 1868-74, Mar 7 2013.
- 521 [10] D. Groeneveld *et al.*, "Von Willebrand factor delays liver repair after  
522 acetaminophen-induced acute liver injury in mice," *J Hepatol*, vol. 72, no. 1, pp.  
523 146-155, Jan 2020.
- 524 [11] K. Miyakawa *et al.*, "Platelets and protease-activated receptor-4 contribute to  
525 acetaminophen-induced liver injury in mice," *Blood*, vol. 126, no. 15, pp. 1835-43,  
526 Oct 8 2015.
- 527 [12] A. Chauhan *et al.*, "The platelet receptor CLEC-2 blocks neutrophil mediated  
528 hepatic recovery in acetaminophen induced acute liver failure," *Nat Commun*, vol.  
529 11, no. 1, p. 1939, Apr 22 2020.

- 530 [13] C. G. Lee *et al.*, "Role of chitin and chitinase/chitinase-like proteins in  
531 inflammation, tissue remodeling, and injury," *Annu Rev Physiol*, vol. 73, pp. 479-  
532 501, 2011.
- 533 [14] B. E. Hakala, C. White, and A. D. Recklies, "Human cartilage gp-39, a major  
534 secretory product of articular chondrocytes and synovial cells, is a mammalian  
535 member of a chitinase protein family," *J Biol Chem*, vol. 268, no. 34, pp. 25803-  
536 10, Dec 5 1993.
- 537 [15] M. Kawada, Y. Hachiya, A. Arihiro, and E. Mizoguchi, "Role of mammalian  
538 chitinases in inflammatory conditions," *Keio J Med*, vol. 56, no. 1, pp. 21-7, Mar  
539 2007.
- 540 [16] C. G. Lee *et al.*, "Role of breast regression protein 39 (BRP-39)/chitinase 3-like-1  
541 in Th2 and IL-13-induced tissue responses and apoptosis," *J Exp Med*, vol. 206,  
542 no. 5, pp. 1149-66, May 11 2009.
- 543 [17] E. Kumagai *et al.*, "Serum YKL-40 as a marker of liver fibrosis in patients with  
544 non-alcoholic fatty liver disease," *Sci Rep*, vol. 6, p. 35282, Oct 14 2016.
- 545 [18] C. Nojgaard *et al.*, "Serum levels of YKL-40 and PIIINP as prognostic markers in  
546 patients with alcoholic liver disease," (in English), *Journal of Hepatology*, vol. 39,  
547 no. 2, pp. 179-186, Aug 2003.
- 548 [19] S. Wang *et al.*, "CHI3L1 in the pathophysiology and diagnosis of liver diseases,"  
549 *Biomed Pharmacother*, vol. 131, p. 110680, Nov 2020.
- 550 [20] Z. Shan *et al.*, "Chitinase 3-like-1 promotes intrahepatic activation of coagulation  
551 through induction of tissue factor in mice," *Hepatology*, vol. 67, no. 6, pp. 2384-  
552 2396, Jun 2018.

- 553 [21] P. M. Harrison, J. G. O'Grady, R. T. Keays, G. J. Alexander, and R. Williams,  
554 "Serial prothrombin time as prognostic indicator in paracetamol induced fulminant  
555 hepatic failure," *BMJ*, vol. 301, no. 6758, pp. 964-6, Oct 27 1990.
- 556 [22] H. Ponta, L. Sherman, and P. A. Herrlich, "CD44: from adhesion molecules to  
557 signalling regulators," *Nat Rev Mol Cell Biol*, vol. 4, no. 1, pp. 33-45, Jan 2003.
- 558 [23] J. E. Fisher *et al.*, "Role of Kupffer cells and toll-like receptor 4 in acetaminophen-  
559 induced acute liver failure," *J Surg Res*, vol. 180, no. 1, pp. 147-55, Mar 2013.
- 560 [24] C. Ju *et al.*, "Protective role of Kupffer cells in acetaminophen-induced hepatic  
561 injury in mice," *Chem Res Toxicol*, vol. 15, no. 12, pp. 1504-13, Dec 2002.
- 562 [25] S. N. Campion *et al.*, "Hepatic Mrp4 induction following acetaminophen exposure  
563 is dependent on Kupffer cell function," (in English), *American Journal of  
564 Physiology-Gastrointestinal and Liver Physiology*, vol. 295, no. 2, pp. G294-G304,  
565 Aug 2008.
- 566 [26] M. P. Holt, L. Cheng, and C. Ju, "Identification and characterization of infiltrating  
567 macrophages in acetaminophen-induced liver injury," *J Leukoc Biol*, vol. 84, no. 6,  
568 pp. 1410-21, Dec 2008.
- 569 [27] E. Larsen *et al.*, "PADGEM protein: a receptor that mediates the interaction of  
570 activated platelets with neutrophils and monocytes," *Cell*, vol. 59, no. 2, pp. 305-  
571 12, Oct 20 1989.
- 572 [28] S. A. Hamburger and R. P. McEver, "GMP-140 mediates adhesion of stimulated  
573 platelets to neutrophils," *Blood*, vol. 75, no. 3, pp. 550-4, Feb 1 1990.

- 574 [29] D. I. Simon *et al.*, "Platelet glycoprotein Iba1 is a counterreceptor for the  
575 leukocyte integrin Mac-1 (CD11b/CD18)," *J Exp Med*, vol. 192, no. 2, pp. 193-  
576 204, Jul 17 2000.
- 577 [30] J. R. Hitchcock *et al.*, "Inflammation drives thrombosis after Salmonella infection  
578 via CLEC-2 on platelets," *J Clin Invest*, vol. 125, no. 12, pp. 4429-46, Dec 2015.
- 579 [31] A. M. Kerrigan *et al.*, "Podoplanin-expressing inflammatory macrophages activate  
580 murine platelets via CLEC-2," *J Thromb Haemost*, vol. 10, no. 3, pp. 484-6, Mar  
581 2012.
- 582 [32] M. Higashiyama *et al.*, "Chitinase 3-like 1 deficiency ameliorates liver fibrosis by  
583 promoting hepatic macrophage apoptosis," (in English), *Hepatology Research*,  
584 vol. 49, no. 11, pp. 1316-1328, Nov 2019.
- 585 [33] D. H. Lee *et al.*, "Chitinase-3-like-1 deficiency attenuates ethanol-induced liver  
586 injury by inhibition of sterol regulatory element binding protein 1-dependent  
587 triglyceride synthesis," (in English), *Metabolism-Clinical and Experimental*, vol. 95,  
588 pp. 46-56, Jun 2019.
- 589 [34] S. Zhang *et al.*, "Role of Chitinase 3-Like 1 Protein in the Pathogenesis of  
590 Hepatic Insulin Resistance in Nonalcoholic Fatty Liver Disease," *Cells*, vol. 10, no.  
591 2, Jan 20 2021.
- 592 [35] Q. C. Qiu *et al.*, "CHI3L1 promotes tumor progression by activating TGF-beta  
593 signaling pathway in hepatocellular carcinoma," *Sci Rep*, vol. 8, no. 1, p. 15029,  
594 Oct 9 2018.

- 595 [36] Y. Zhou *et al.*, "Chitinase 3-like-1 and its receptors in Hermansky-Pudlak  
596 syndrome-associated lung disease," *J Clin Invest*, vol. 125, no. 8, pp. 3178-92,  
597 Aug 3 2015.
- 598 [37] C. H. He *et al.*, "Chitinase 3-like 1 regulates cellular and tissue responses via IL-  
599 13 receptor alpha2," *Cell Rep*, vol. 4, no. 4, pp. 830-41, Aug 29 2013.
- 600 [38] C. M. Lee *et al.*, "IL-13Ralpha2 uses TMEM219 in chitinase 3-like-1-induced  
601 signalling and effector responses," *Nat Commun*, vol. 7, p. 12752, Sep 15 2016.
- 602 [39] B. Geng *et al.*, "Chitinase 3-like 1-CD44 interaction promotes metastasis and  
603 epithelial-to-mesenchymal transition through beta-catenin/Erk/Akt signaling in  
604 gastric cancer," *J Exp Clin Cancer Res*, vol. 37, no. 1, p. 208, Aug 30 2018.
- 605 [40] Y. Zhou *et al.*, "Galectin-3 Interacts with the CHI3L1 Axis and Contributes to  
606 Hermansky-Pudlak Syndrome Lung Disease," *J Immunol*, vol. 200, no. 6, pp.  
607 2140-2153, Mar 15 2018.
- 608 [41] D. L. Laskin, C. R. Gardner, V. F. Price, and D. J. Jollow, "Modulation of  
609 macrophage functioning abrogates the acute hepatotoxicity of acetaminophen,"  
610 *Hepatology*, vol. 21, no. 4, pp. 1045-50, Apr 1995.
- 611 [42] S. L. Michael, N. R. Pumford, P. R. Mayeux, M. R. Niesman, and J. A. Hinson,  
612 "Pretreatment of mice with macrophage inactivators decreases acetaminophen  
613 hepatotoxicity and the formation of reactive oxygen and nitrogen species,"  
614 *Hepatology*, vol. 30, no. 1, pp. 186-95, Jul 1999.
- 615 [43] J. C. Mossanen *et al.*, "Chemokine (C-C motif) receptor 2-positive monocytes  
616 aggravate the early phase of acetaminophen-induced acute liver injury,"  
617 *Hepatology*, vol. 64, no. 5, pp. 1667-1682, Nov 2016.



- 618 [44] E. Zigmond *et al.*, "Infiltrating monocyte-derived macrophages and resident  
619 kupffer cells display different ontogeny and functions in acute liver injury," *J*  
620 *Immunol*, vol. 193, no. 1, pp. 344-53, Jul 1 2014.
- 621 [45] A. Chauhan, D. H. Adams, S. P. Watson, and P. F. Lalor, "Platelets: No longer  
622 bystanders in liver disease," (in English), *Hepatology*, vol. 64, no. 5, pp. 1774-  
623 1784, Nov 2016.
- 624 [46] A. M. Larson *et al.*, "Acetaminophen-induced acute liver failure: results of a  
625 United States multicenter, prospective study," *Hepatology*, vol. 42, no. 6, pp.  
626 1364-72, Dec 2005.
- 627 [47] F. Guerrero Munoz and Z. Fearon, "Sex related differences in acetaminophen  
628 toxicity in the mouse," *J Toxicol Clin Toxicol*, vol. 22, no. 2, pp. 149-56, 1984.
- 629 [48] Q. Da, P. J. Derry, F. W. Lam, and R. E. Rumbaut, "Fluorescent labeling of  
630 endogenous platelets for intravital microscopy: Effects on platelet function," (in  
631 English), *Microcirculation*, vol. 25, no. 6, Aug 2018.
- 632 [49] P. E. Marques, M. M. Antunes, B. A. David, R. V. Pereira, M. M. Teixeira, and G.  
633 B. Menezes, "Imaging liver biology in vivo using conventional confocal  
634 microscopy," (in English), *Nature Protocols*, vol. 10, no. 2, pp. 258-268, Feb 2015.
- 635 [50] M. Deng *et al.*, "LILRB4 signalling in leukaemia cells mediates T cell suppression  
636 and tumour infiltration," *Nature*, vol. 562, no. 7728, pp. 605-609, Oct 2018.

637

638

639

640

641

642

643

644

645

646

647

648

649

650

651

652 **Figures**

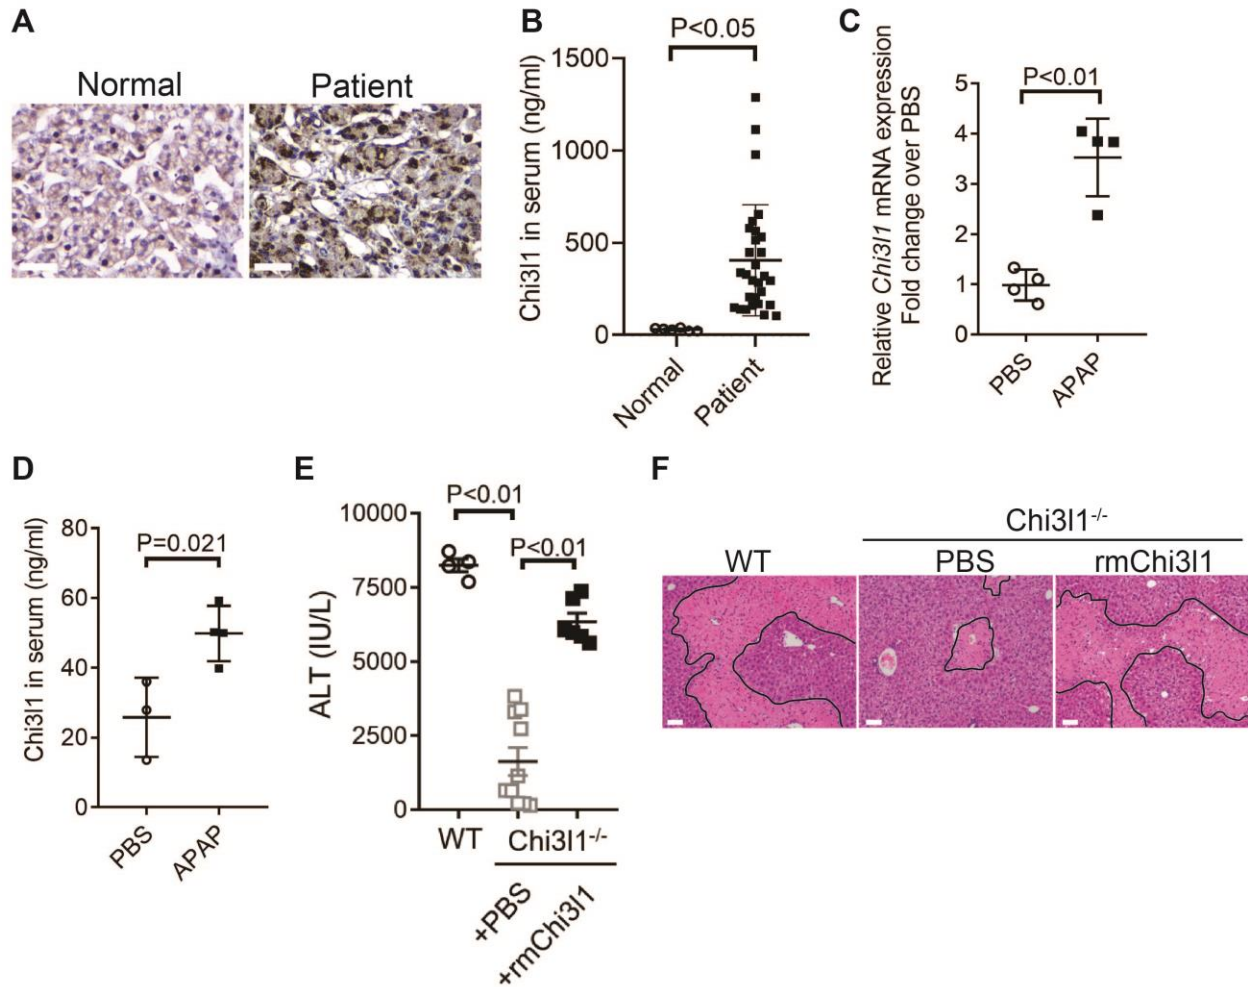

653  
654 **Figure 1. Chi3I1 is upregulated and play a critical role in ALI.** (A) IHC staining for Chi3I1 in  
655 normal liver biopsies (Normal) and those from patients with ALI (Patient). Images shown are  
656 representative of 10 samples/group. Scale bar, 250 $\mu$ m. (B) ELISA analysis of Chi3I1 in serum of  
657 healthy individuals (Normal, n=6) and those from patients with ALI (Patient, n=29). Data were  
658 presented as median + interquartile range. (C, D) Male C57B/6 mice treated with PBS or APAP.  
659 (C) *Chi3I1* mRNA in liver homogenates and (D) Chi3I1 protein levels in serum were measured  
660 by qRT-PCR and ELISA at 3hrs and 24hrs, respectively (n=4 mice/group). (E, F) Male C57B/6  
661 (WT) and *Chi3I1*<sup>-/-</sup> mice were treated with APAP. Additionally, *Chi3I1*<sup>-/-</sup> mice were divided into  
662 two groups treated with either PBS or recombinant mouse Chi3I1 (rmChi3I1) simultaneously  
663 with APAP (n=4-10 mice/group). (E) Serum levels of ALT and (F) liver histology with necrotic  
664 areas outlined were evaluated 24hrs after APAP treatment. Scale bar, 250 $\mu$ m. Mann-Whitney  
665 test was performed in B. Two-tailed, unpaired student t-test was performed in C, D. One-way  
666 ANOVA were performed in E.  
667

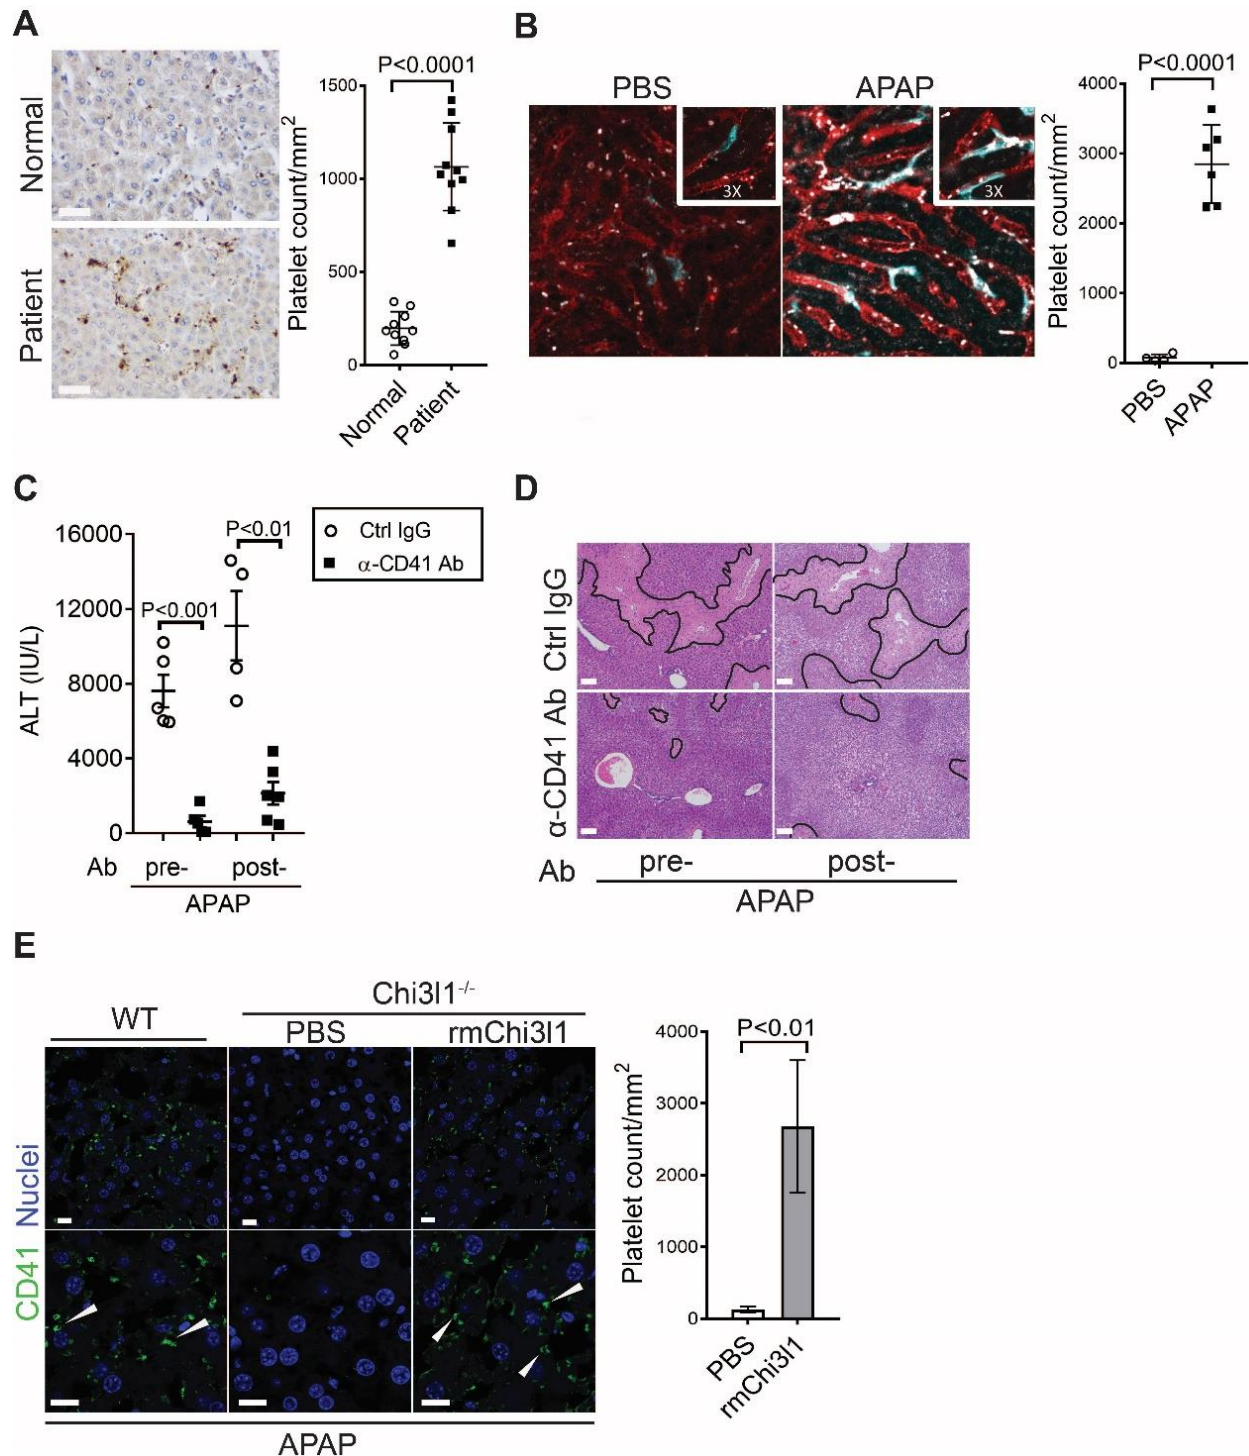

668  
669 **Figure 2. Chi311 contributes to AILI by promoting hepatic platelet recruitment.** (A) IHC  
670 staining to detect platelets (CD41<sup>+</sup>) in healthy liver biopsies (Normal) and those from patients  
671 with AILI (Patient). Scale bar, 250µm. (n=10/group) (B) Male C57B/6 mice treated with PBS or  
672 APAP. Intravital microscopy analyses were performed around 3 hrs post APAP. Mφs (cyan) and  
673 platelets (white) in liver sinusoids (red) are indicated. Representative images were chosen from  
674 intravital microscopy videos: <https://bcm.box.com/s/15hmtryyrdl302mihrrsm034ure87x4ea>  
675 (Supplemental video 1, PBS treatment) and

676 <https://bcm.box.com/s/tuljfmstvv4lvoksx16fkxkpirkekynz> (Supplemental Video 2, APAP  
 677 treatment)(n=6-7 mice/group, 4-15 videos/mouse). Two-tailed, unpaired student t-test was  
 678 performed. (C-E) Male C57B/6 (WT) mice were treated with control IgG (Ctrl IgG) or an anti-  
 679 CD41 antibody ( $\alpha$ -CD41 Ab) either 3hrs before or 3hrs after APAP administration. (C) Serum  
 680 levels of ALT and (D) liver histology with necrotic areas outlined were evaluated 24hrs after  
 681 APAP treatment (n=5 mice/group in C, D). Scale bar, 250 $\mu$ m. (E) IF staining was performed to  
 682 detect intrahepatic platelets (CD41<sup>+</sup>) 3hrs after APAP treatment (n=3 mice/group). Scale bar,  
 683 25 $\mu$ m. Two-tailed, unpaired student t-test was performed in A-C, E.  
 684

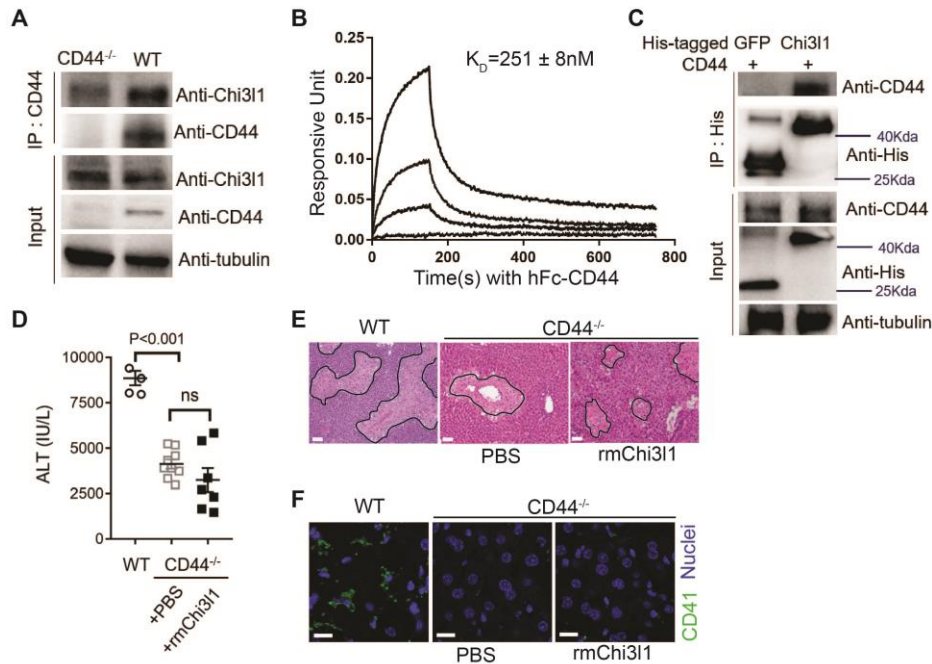

685  
 686  
 687 **Figure 3. Chi311 functions through its receptor CD44.** (A) Immuno-precipitation with anti-  
 688 CD44 antibody was performed using liver homogenates obtained from WT and CD44<sup>-/-</sup> mice  
 689 treated with APAP for 2hrs. Input proteins and immune-precipitated proteins were blotted with  
 690 the indicated antibodies. (B) Interferometry measurement of the binding kinetics of human His-  
 691 Chi311 with human Fc-CD44. (C) His-tagged control GFP and human Chi311 were incubated  
 692 with recombinant human CD44. Proteins bound to Chi311 were immune-precipitated with an  
 693 anti-His antibody. Input proteins and immune-precipitated proteins were blotted with indicated  
 694 antibodies. (D-F) Male WT mice were treated with APAP and CD44<sup>-/-</sup> mice were treated with  
 695 PBS or rmChi311 plus APAP. (D) Serum levels of ALT and (E) liver histology with necrotic areas  
 696 outlined were evaluated 24hrs after APAP treatment (n=4-9 mice/group in A, B). Scale bar,  
 697 250 $\mu$ m. (F) IF staining was performed to detect intrahepatic platelets (CD41<sup>+</sup>) 3hrs after APAP  
 698 treatment (n=3 mice/group). Scale bar, 25 $\mu$ m. One-way ANOVA were performed in D.  
 699  
 700  
 701

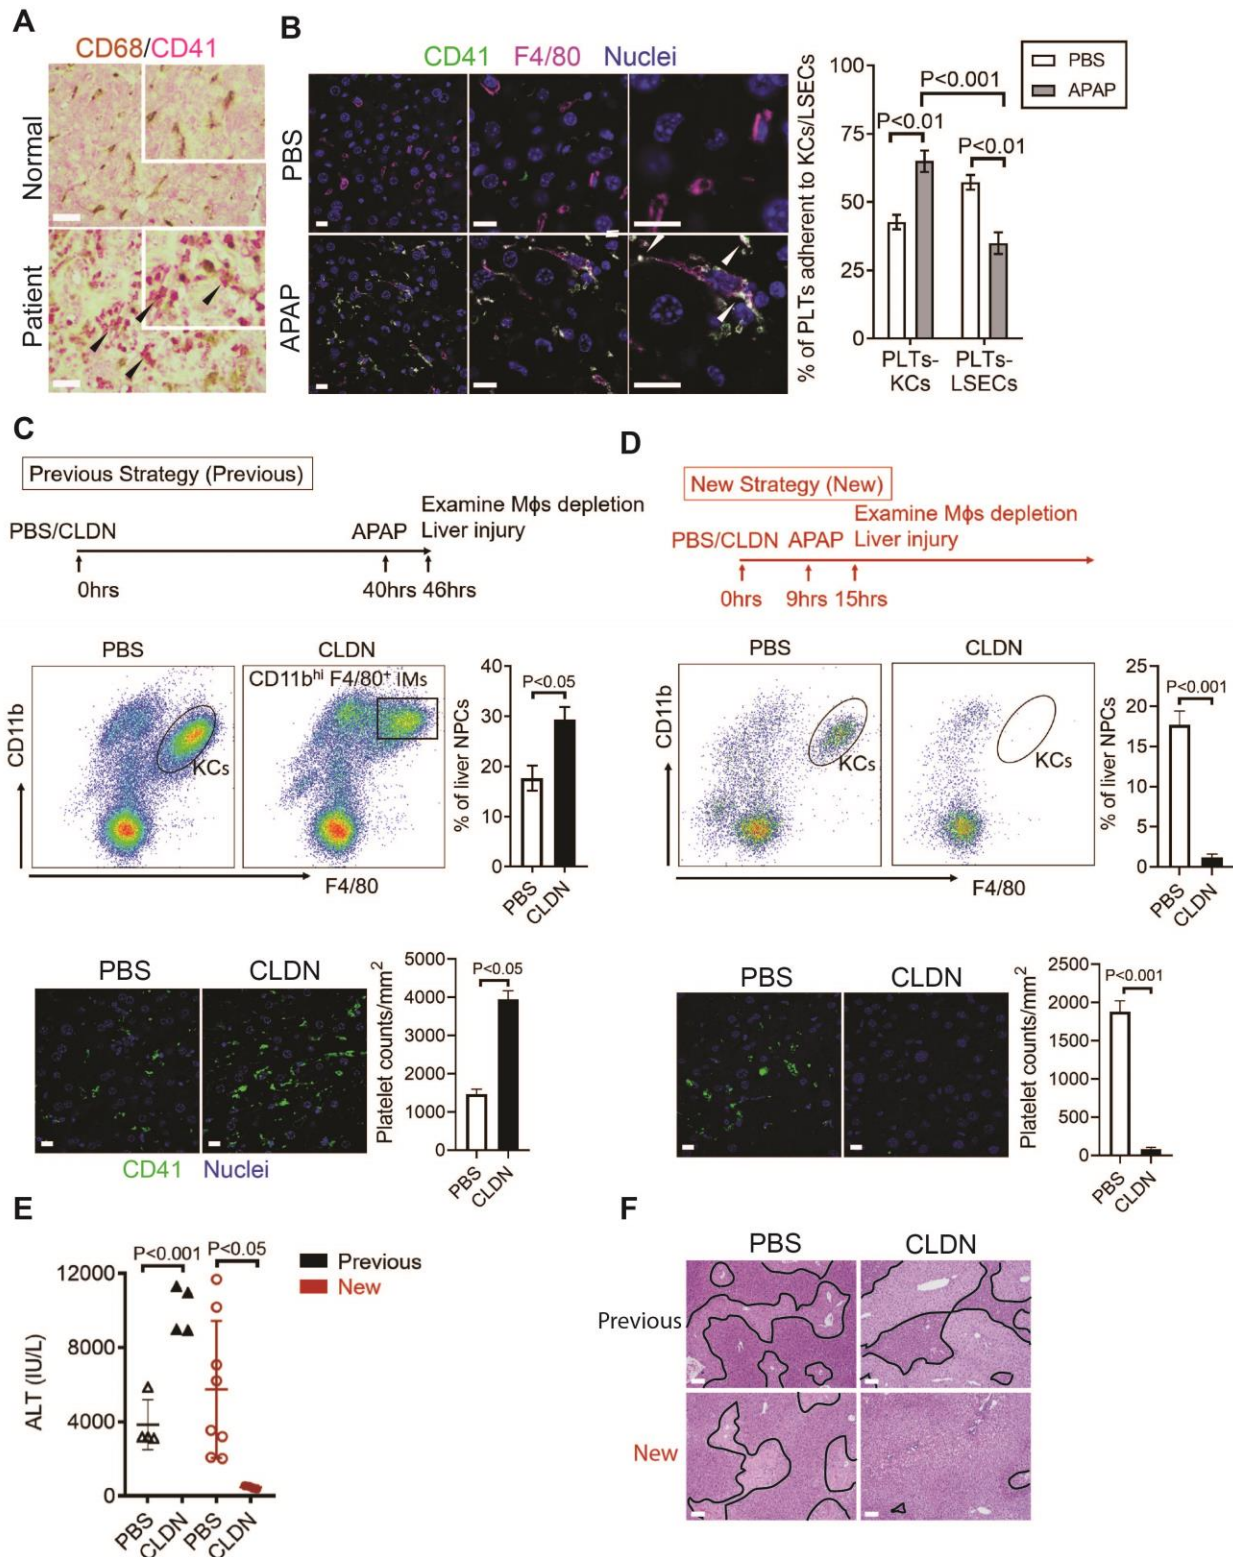

702  
703  
704  
705  
706

**Figure 4. Hepatic Mφs promote platelet recruitment.** (A) IHC staining for macrophages (CD68<sup>+</sup>) and platelets (CD41<sup>+</sup>) in normal liver biopsies (Normal) and those from patients with ALI (Patient) (n=10/group). Scale bar, 25μm. (B) IF staining for intrahepatic platelets (CD41<sup>+</sup>) and KCs (F4/80<sup>+</sup>) in male C57B/6 mice treated with PBS or APAP for 3hrs. Scale bar, 25μm.

707 Arrowheads indicate platelets adherent to KCs. Quantification of platelets adherent to KCs or  
708 LSECs. **(C-F)** Male C57B/6 mice were injected with either empty liposomes containing PBS  
709 (PBS) or liposomes containing clodronate (CLDN), followed by APAP treatment. **(C, D)** NPCs  
710 were isolated and underwent flow cytometry analysis. Indicated cells were gated on single live  
711 CD45<sup>+</sup>CD146<sup>-</sup> cells. IF staining was performed to detect intrahepatic platelets (CD41<sup>+</sup>). Scale  
712 bar, 25µm. **(E)** Serum levels of ALT and **(F)** liver histology with necrotic areas outlined. Scale  
713 bar, 250µm. (n=6 mice/group in B-F). Two-tailed, unpaired student t-test was performed in **B-D,**  
714 **F.**

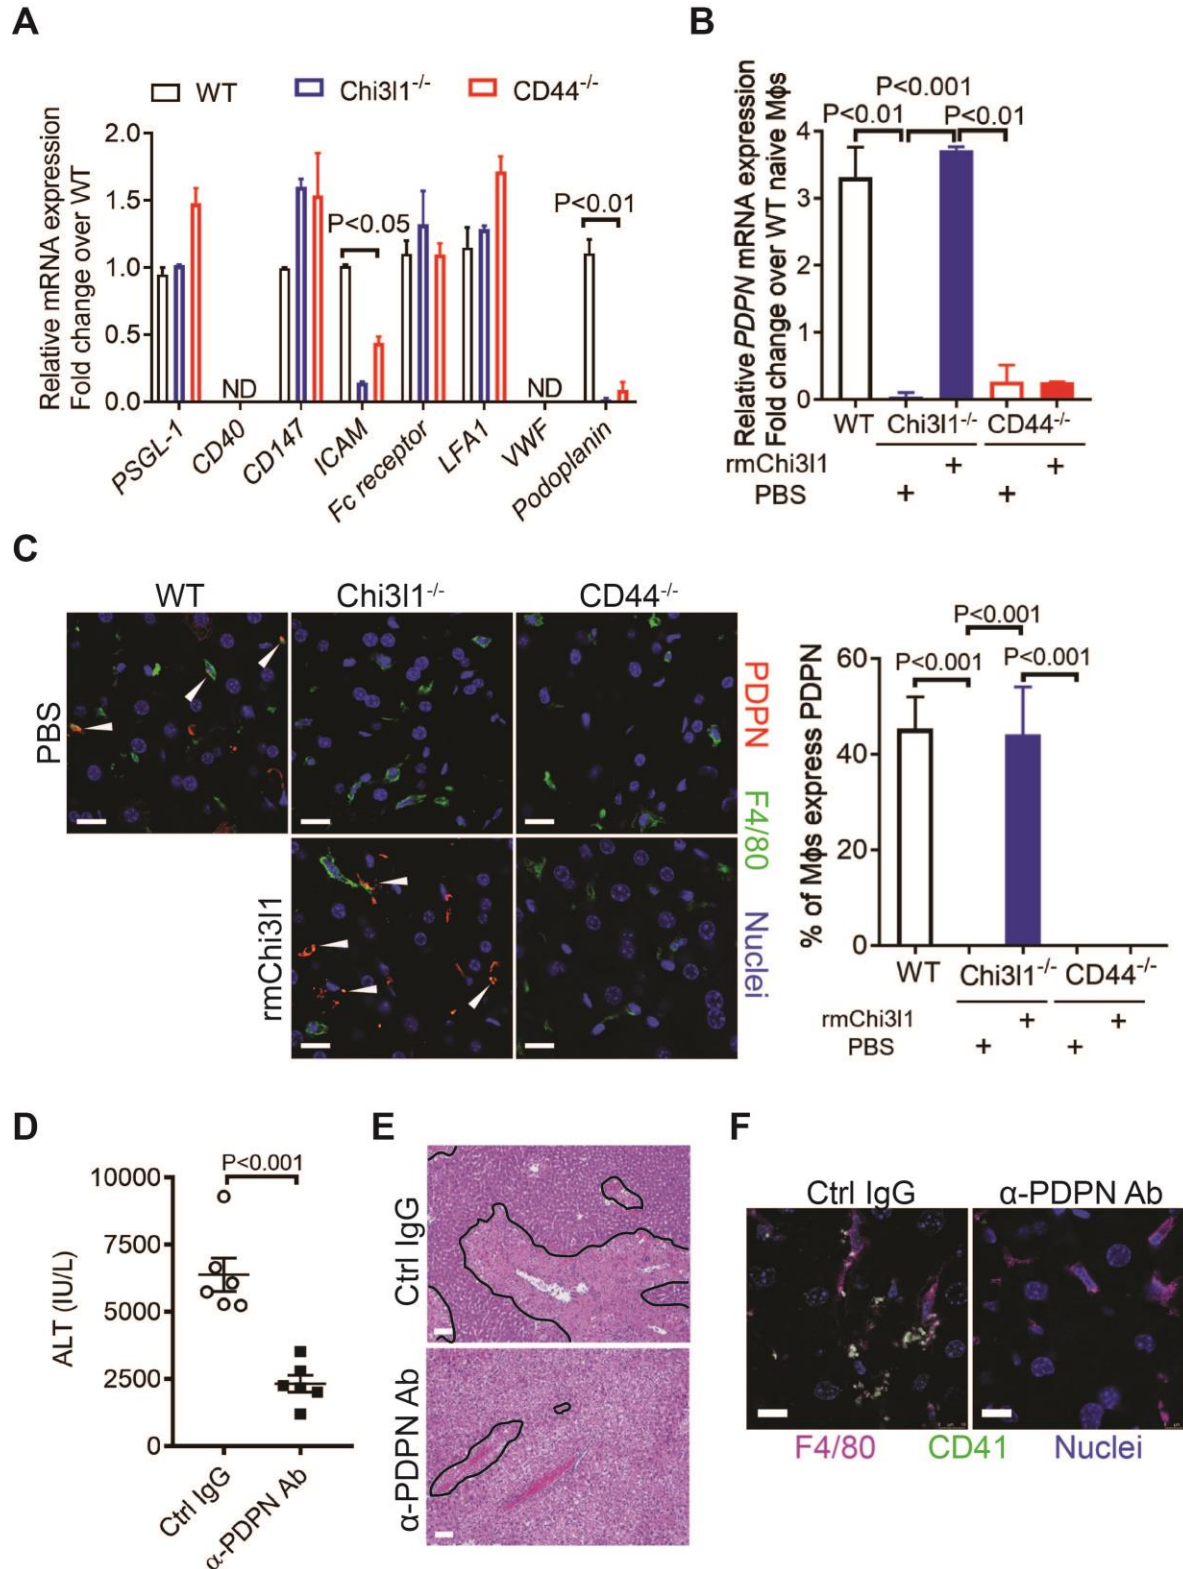

715  
716  
717  
718

**Figure 5. Chi311/CD44 signaling in Mφs upregulates podoplanin expression and platelet adhesion.** (A) Male WT, Chi311<sup>-/-</sup>, CD44<sup>-/-</sup> mice were treated with APAP (n=4 mice/group). After 3hrs, mice were sacrificed and Mφs were isolated to measure mRNA levels of various adhesion



719 molecules, including P-Selectin Glycoprotein Ligand 1 (PSGL-1), CD40, CD147, Fc receptor,  
 720 intercellular adhesion molecule (ICAM), lymphocyte function-associated antigen (LFA1), von  
 721 Willebrand Factor (VWF), and podoplanin. One-way ANOVA were performed. **(B, C)** WT mice  
 722 were treated with APAP. Chi311<sup>-/-</sup> and CD44<sup>-/-</sup> mice were treated with PBS or rmChi311 followed  
 723 by APAP challenge simultaneously and mice were sacrificed 3hrs after APAP (n=3 mice/group).  
 724 **(B)** Mφs were isolated and mRNA levels of *PDPN* in Mφs were analyzed by qRT-PCR. **(C)** IF  
 725 staining of liver sections for PDPN and F4/80 is shown and the proportions of Mφs that express  
 726 PDPN were quantified, Scale bar, 25μm. **(D-F)** Chi311<sup>-/-</sup> mice reconstituted with rmChi311 were  
 727 treated with either Ctrl IgG or α-podoplanin Ab for 16hrs and subsequently challenged with  
 728 APAP. **(D)** Serum levels of ALT and **(E)** liver histology were evaluated 24hrs after APAP  
 729 treatment (n=6 mice/group). Scale bar, 250μm. **(F)** IF staining for intrahepatic platelets (CD41<sup>+</sup>)  
 730 and Mφs (F4/80+) was performed 3hrs after APAP (n=3 mice/group). Scale bar, 25μm. One-way  
 731 ANOVA were performed in **A-C**. Two-tailed, unpaired student t-test was performed in **E**.  
 732

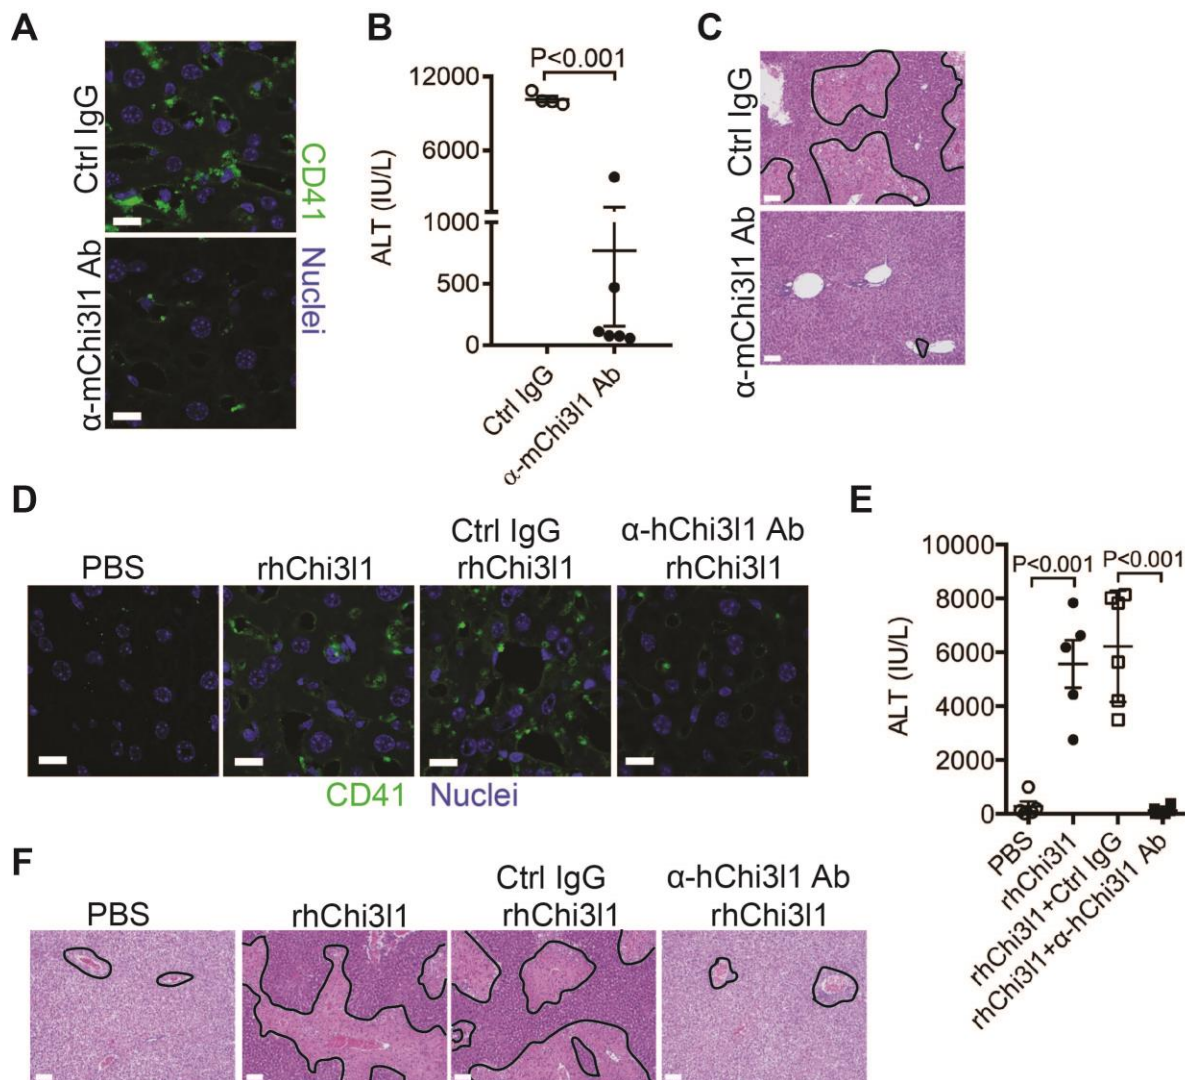

733  
 734  
 735 **Figure 6. Evaluation of the therapeutic potential of targeting Chi311 in the treatment of**  
 736 **ALI.** **(A-C)** Male C57B/6 mice were treated with APAP for 3hrs, followed by *i.p.* injection of  
 737 either a control IgG (Ctrl IgG) or an anti-mouse Chi311 Ab (α-mChi311 Ab, C59). **(A)** IF staining  
 738 for intrahepatic platelets (CD41<sup>+</sup>) was performed 6hrs after APAP treatment (n=3 mice/group).

739 Scale bar, 25 $\mu$ m. (B) Serum levels of ALT and (C) liver histology were evaluated 24hrs after  
740 APAP treatment (n=4-6 mice/group). Scale bar, 250 $\mu$ m. (D-F) Chi311<sup>-/-</sup> mice were treated with  
741 APAP plus PBS or recombinant human Chi311 (rhChi311) for 3hrs as indicated and APAP plus  
742 rhChi311 treatment group were either without treatment or treated with a control IgG (Ctrl IgG) or  
743 an anti-human Chi311 Ab ( $\alpha$ -hChi311 Ab, C7). (D) IF staining was performed to identify  
744 intrahepatic platelets (CD41<sup>+</sup>) 6hrs after APAP treatment. Scale bar, 25 $\mu$ m. (E) Serum levels of  
745 ALT and (F) liver histology were evaluated 24hrs after APAP treatment. Scale bar, 250 $\mu$ m.  
746 (n=5-10 mice/group in D-F). Two-tailed, unpaired student t-test was performed in B. One-way  
747 ANOVA were performed in F.  
748

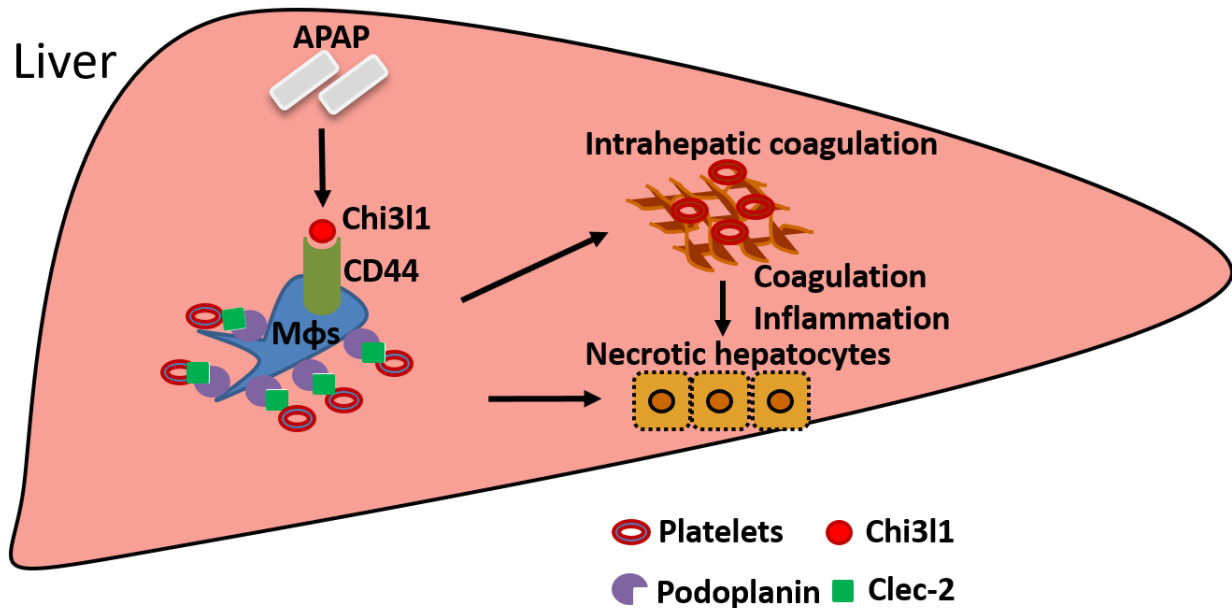

749  
750 **Figure 7. Schematic summary of the main findings.** APAP overdose induces Chi311  
751 expression, which binds CD44 on Mφs and promotes Mφs-mediated platelets recruitment  
752 through podoplanin/Clec-2 interaction. Recruited platelets further contribute to AILI.  
753  
754

755

756

757

758

759

760

761

762

763 **Supplementary Materials and Methods**

764

765 **Blocking endogenous CD44:** Mice were *i.p.* injected with Ctrl IgG (BD Pharmingen, 559478,  
766 50µg/mouse) or anti-CD44 antibody (BD Pharmingen, 553131, 50µg/mouse) in Chi3l1<sup>-/-</sup>  
767 reconstituted with rmChi3l1 at 30 min prior to APAP treatment.

768

769 **Preparation of liver cells and *in vitro* cell culture.** Hepatic nonparenchymal cells (NPCs) and  
770 hepatocytes were isolated as previously described[20]. In brief, mice were anesthetized and  
771 liver tissues were perfused with EGTA solution, followed by a 0.04% collagenase digestion  
772 buffer. Liver hepatocytes and NPCs were isolated by gradient centrifugation using 35% percoll  
773 (Sigma). To further purify LSEC and Mφs, LSEC and Mφs fractions were stained with  
774 phycoerythrin (PE)-conjugated anti-CD146(for LSEC, Invitrogen, 12-1469-42), and anti-  
775 F4/80(for Mφs, Invitrogen, 12-4801-82) antibodies and positively selected using EasySep™  
776 Mouse PE Positive Selection Kit (Stemcell technologies) following manufacturers' instructions.  
777 Each subset will yield a purity around 90%.

778

779 *Co-culture of Mφs and platelets:* Isolated Mφs were cultured in DMEM with 10% fetal bovine  
780 serum and pre-treated with Podoplanin antibody (Bioxcell InvivoMab, BE0236, 2µg/ml) for  
781 30mins and then co-culture with washed platelets for 30mins. Unbound platelets were washed  
782 out and Podoplanin and Clec-2 on Mφs were stained.

783

784 **Isolation of platelets.** Mouse whole blood was collected with anti-coagulant ACD solution from  
785 inferior vena cava. Platelets were further isolated by additional washes with Tyrode's buffer.  
786 Isolated washed platelets were subjected to functional assay after incubation with PGI<sub>2</sub> (Sigma,  
787 P6188) for 30mins.

788

789 **Flow cytometry.** Isolated liver NPCs were incubated with 1µl of anti-mouse FcγRII/III (Becton  
790 Dickinson, Franklin Lakes, NJ, USA) to minimize non-specific antibody binding. The cells were  
791 then stained with anti-mouse CD45-V655 (eBioscience, 15520837), F4/80-APC/Cy7 (Biolegend,  
792 123118), Ly6C-APC (BD Pharmingen, 560595), Ly6G-V450 (BD Pharmingen, 560603), CD146-  
793 PerCP-Cy5.5 (BD Pharmingen, 562134), CD44-PE (BD Pharmingen, 553134), anti-His-FITC  
794 (abcam, ab1206). In some experiments, cells were incubated with 2µg rmChi3l1 for 2h before  
795 antibody staining. The cells were analyzed on a CytoFLEX LX Flow Cytometer (Beckman  
796 coulter, IN, USA) using FlowJo software (Tree Star, Ashland, OR, USA). For flow cytometric  
797 analysis, CD45<sup>+</sup> cells were gated to exclude endothelial cells, hepatic stellate cells, and residue  
798 hepatocytes. Within CD45<sup>+</sup> cells, CD44<sup>+</sup> cells that bind to Chi3l1 were back gated to determine  
799 the cells types.

800

801 **Extraction of liver proteins, immunoprecipitation, and mass spectrometry.** Snap frozen  
802 liver tissues were pulverized to extract liver proteins in STE buffer. Protein concentration was  
803 measured by BCA kit (Thermo Scientific, 23225) following the manufacturer's instructions.

804

805 *Immunoprecipitation of NPCs lysates:* Proteins were extracted from NPCs lysates and  
806 incubated with 5µg rmChi3l1, followed by immunoprecipitation with 2µg Rabbit IgG (negative  
807 control, Peprotech, 500-p00) or 2µg anti-his tag antibody (Abnova, MAB12807). Dynabeads  
808 Protein G (Invitrogen, 1003D) were used to pull down antibodies-binding proteins.  
809 Immunoprecipitated proteins were subject to mass spectrometry analyses by the Proteomics  
810 Core Facility at UTHealth.

811

812 *Immunoprecipitation of liver homogenates:* CD44<sup>-/-</sup> and WT mice were treated with APAP for 2h.  
813 10mg liver proteins were extracted from treated mice and incubated with 5µg rmChi3l1, followed  
814 by immunoprecipitation with 2µg anti-CD44 antibody (BD Pharmingen, 553131). Dynabeads

815 Protein G (Invitrogen, 1003D) were used to pull down antibody-binding proteins. Input and  
816 immunoprecipitated proteins were subject to western blot analyses.

817

818 *In vitro immunoprecipitation assays:* 2µg rhChi3l1(Sino Biological, His Tag, 11227-H08H) or 2µg  
819 GST protein (His Tag) as control were incubated with 2µg human CD44 (Sino Biological, Fc Tag,  
820 12211-H02H) and immunoprecipitated with 2µg anti-His antibody (Abnova, MAB12807). Input  
821 and immunoprecipitated proteins were subject to western blot analyses.

822

823 **Western blotting.** Samples were prepared with loading buffer and boiled before loading onto  
824 SDS-PAGE gels. Nitrocellulose membranes (Bio-Rad) were used to transfer proteins. Primary  
825 antibodies used to detect specific proteins: anti-Chi3l1 (Proteintech, 12036-1-AP, 1:1000), anti-  
826 CD44 (abcam, ab25340, 1:500), anti-β-actin(Cell Signaling, 4970, 1:1000), anti-His (Abnova,  
827 MAB12807, 1:1000), anti-cyp2e1 (LifeSpan BioSciences, LS-C6332, 1:500), anti-APAP  
828 adducts[24] (provided by Dr. Lance R. Pohl, NIH, 1:500). Secondary antibodies include goat  
829 anti-Rabbit IgG (Jackson ImmunoResearch, 111-035-144, 1:1000), goat anti-Rat (Jackson  
830 ImmunoResearch, 112-035-003, 1:1000).

831

832 **Quantitative Real-Time Reverse Transcriptase Polymerase Chain Reaction (qRT-PCR).**

833 Total RNA was isolated from  $1 \times 10^6$  cells using RNeasy Mini Kit (Qiagen, Valencia, CA). After  
834 the removal of genomic DNA, RNA was reversely transcribed into cDNA using Moloney murine  
835 leukemia virus RT (Invitrogen, Carlsbad, CA) with oligo (dT) primers (Invitrogen). Quantitative  
836 PCR was performed using SYBR green master mix (Applied Biosystem) in triplicates on a Real-  
837 Time PCR 7500 SDS system and software following manufacturer's instruction (Life  
838 Technologies, Grand Island, NY, USA). RNA content was normalized based on amplification of  
839 18S ribosomal RNA (rRNA) (18S). Change folds = normalized data of experimental

840 sample/normalized data of control. The specific primer pairs used for PCR are listed in Table 1  
841 below:

842 **Table 1 Real-Time PCR Primers used**

| Gene        | Forward(F)/Reverse(R) Primer | Primer sequences         |
|-------------|------------------------------|--------------------------|
| Podoplanin  | F                            | ACCGTGCCAGTGTTGTTCTG     |
|             | R                            | AGCACCTGTGGTTGTTATTTTGT  |
| PSGL-1      | F                            | GAAAGGGCTGATTGTGACCCC    |
|             | R                            | AGTAGTTCCGCACTGGGTACA    |
| CD40        | F                            | TGTCATCTGTGAAAAGGTGGTC   |
|             | R                            | ACTGGAGCAGCGGTGTTATG     |
| CD147       | F                            | GTGGCGTTGACATCGTTGG      |
|             | R                            | CTATGTA CTTCGTATGCAGGTCG |
| ICAM        | F                            | GTGATGCTCAGGTATCCATCCA   |
|             | R                            | CACAGTTCTCAAAGCACAGCG    |
| Fc receptor | F                            | AGGGCCTCCATCTGGACTG      |
|             | R                            | GTGGTTCTGGTAATCATGCTCTG  |
| LFA1        | F                            | CCAGACTTTTGCTACTGGGAC    |
|             | R                            | GCTTGTTCCGGCAGTGATAGAG   |
| VWF         | F                            | CTCTTTGGGGACGACTTCATC    |
|             | R                            | TCCCGAGAATGGAGAAGGAAC    |

843

844

845

846

847

848

849

850

851

852  
853  
854  
855  
856

### Supplementary Figures

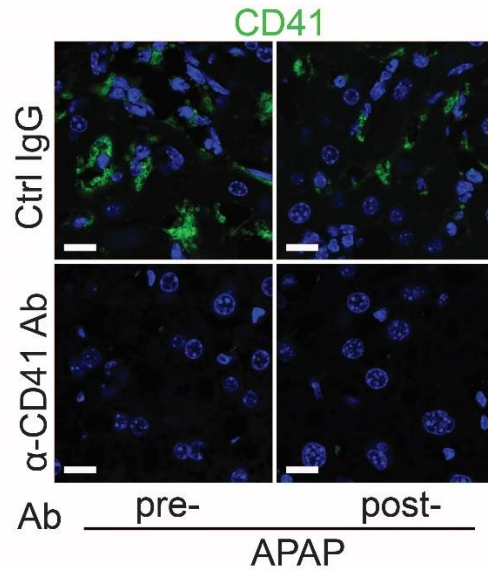

857  
858  
859  
860  
861  
862  
863

**Supplementary Figure 1. Depletion of platelets by anti-CD41 antibody reduces hepatic platelets recruitment.** Male C57B/6 mice were treated with control IgG (Ctrl IgG) or an anti-CD41 antibody ( $\alpha$ -CD41 Ab) either 3hrs before (pre-) or 3hrs after (post) APAP administration. IF staining was performed to identify intrahepatic platelets ( $CD41^+$ ) (n=5 mice/group). Scale bar, 25 $\mu$ m.

|                                   | Score      | Mass         | Matches        | Sequence     | emPAI       |
|-----------------------------------|------------|--------------|----------------|--------------|-------------|
| 1 sp Q8C196 CPSM_MOUSE            | 26134      | 165711       | 1380 (1236)    | 111 (103)    | 25.51       |
| 2 sp O35490 BHMT1_MOUSE           | 3803       | 45448        | 191 (167)      | 24 (19)      | 7.21        |
| 3 sp Q61362 CH3L1_MOUSE           | 3419       | 44150        | 211 (187)      | 25 (25)      | 9.79        |
| 4 sp Q8BWT1 THIM_MOUSE            | 2532       | 42260        | 111 (107)      | 26 (26)      | 26.4        |
| 5 sp P54869 HMCS2_MOUSE           | 2127       | 57300        | 107 (92)       | 27 (25)      | 6.47        |
| 6 sp P56480 ATPB_MOUSE            | 1942       | 56265        | 101 (89)       | 27 (26)      | 8.71        |
| 7 sp P63038 CH60_MOUSE            | 1782       | 61088        | 75 (69)        | 36 (35)      | 12.07       |
| 8 sp Q03265 ATPA_MOUSE            | 1761       | 59830        | 86 (79)        | 33 (31)      | 7.97        |
| 9 tr Q3UJ34 Q3UJ34_MOUSE          | 1725       | 46840        | 72 (66)        | 25 (23)      | 8.45        |
| 10 sp Q8R0Y6 AL1L1_MOUSE          | 1545       | 99502        | 77 (68)        | 49 (42)      | 4.57        |
| 11 tr A2NHM3 A2NHM3_MOUSE         | 970        | 24435        | 46 (43)        | 12 (12)      | 6.79        |
| 12 tr I6L9E2 I6L9E2_MOUSE         | 910        | 26130        | 46 (42)        | 11 (11)      | 5.09        |
| 13 sp Q8BMS1 ECHA_MOUSE           | 1510       | 83302        | 52 (50)        | 23 (21)      | 2.07        |
| 14 tr Q3T9S7 Q3T9S7_MOUSE         | 1396       | 130519       | 70 (64)        | 42 (37)      | 2.28        |
| 15 tr A0A0A0MQF6 A0A0A0MQF6_MOUSE | 1343       | 38914        | 53 (51)        | 11 (11)      | 2.13        |
| 16 tr Q3TVM2 Q3TVM2_MOUSE         | 1328       | 57073        | 56 (51)        | 22 (20)      | 3.3         |
| 17 sp Q9DBM2 ECHP_MOUSE           | 1208       | 78822        | 53 (44)        | 27 (25)      | 2.84        |
| 18 tr Q8C6E3 Q8C6E3_MOUSE         | 1197       | 60083        | 55 (49)        | 28 (23)      | 3.95        |
| 19 tr Q5FW97 Q5FW97_MOUSE         | 1191       | 47453        | 50 (45)        | 22 (20)      | 5.13        |
| 20 sp Q9QXD6 F16P1_MOUSE          | 1185       | 37288        | 46 (45)        | 16 (16)      | 6.7         |
| 21 tr Q3TF14 Q3TF14_MOUSE         | 1178       | 48170        | 63 (54)        | 25 (22)      | 5.82        |
| 22 sp Q9DBT9 M2GD_MOUSE           | 1164       | 97422        | 54 (54)        | 32 (32)      | 2.51        |
| 23 sp P19157 GSTP1_MOUSE          | 1160       | 23765        | 51 (46)        | 10 (8)       | 4.55        |
| 24 tr Q3TJ66 Q3TJ66_MOUSE         | 1086       | 39952        | 66 (58)        | 24 (23)      | 10.77       |
| 25 tr Q3TQD9 Q3TQD9_MOUSE         | 1001       | 100662       | 52 (47)        | 32 (29)      | 1.97        |
| 26 sp P19096 FAS_MOUSE            | 999        | 274994       | 46 (44)        | 38 (37)      | 0.62        |
| 27 sp Q9R0H0 ACOX1_MOUSE          | 971        | 75000        | 51 (48)        | 27 (25)      | 2.93        |
| 28 tr Q3UEQ9 Q3UEQ9_MOUSE         | 968        | 103650       | 39 (37)        | 25 (23)      | 1.54        |
| 29 sp P26039 TLN1_MOUSE           | 950        | 271820       | 38 (37)        | 37 (36)      | 0.55        |
| 30 tr Q546G4 Q546G4_MOUSE         | 949        | 70700        | 42 (37)        | 26 (24)      | 2.73        |
| 31 sp Q61176 ARGI1_MOUSE          | 939        | 34957        | 38 (36)        | 15 (15)      | 4.59        |
| 32 tr Q3UA81 Q3UA81_MOUSE         | 911        | 50423        | 52 (46)        | 15 (13)      | 2.78        |
| 33 sp P32020 NLTP_MOUSE           | 906        | 59715        | 41 (36)        | 23 (20)      | 3.03        |
| <b>34 tr CD44 CD44_MOUSE</b>      | <b>881</b> | <b>72614</b> | <b>52 (52)</b> | <b>3 (3)</b> | <b>0.19</b> |
| 35 tr Q3UQ71 Q3UQ71_MOUSE         | 868        | 63073        | 40 (39)        | 20 (20)      | 2.94        |
| 36 tr D3Z041 D3Z041_MOUSE         | 859        | 79011        | 43 (34)        | 26 (21)      | 1.88        |
| 37 tr A0A0R4J135 A0A0R4J135_MOUSE | 804        | 53165        | 33 (30)        | 19 (18)      | 2.75        |
| 38 sp P26443 DHE3_MOUSE           | 804        | 61640        | 48 (43)        | 25 (23)      | 4.56        |

864  
865  
866  
867  
868  
869  
870  
871  
872  
873

**Supplementary Table 1. Representative list of potential Chi311-interacting proteins detected by mass spectrometry.** Non-parenchymal cells were isolated from C57B/6 mice treated with APAP for 3hrs and the cell lysate was incubated with rmChi311 overnight. Proteins potentially bound to rmChi311 were immune-precipitated with an anti-His antibody and subjected to mass spectrometry analyses.



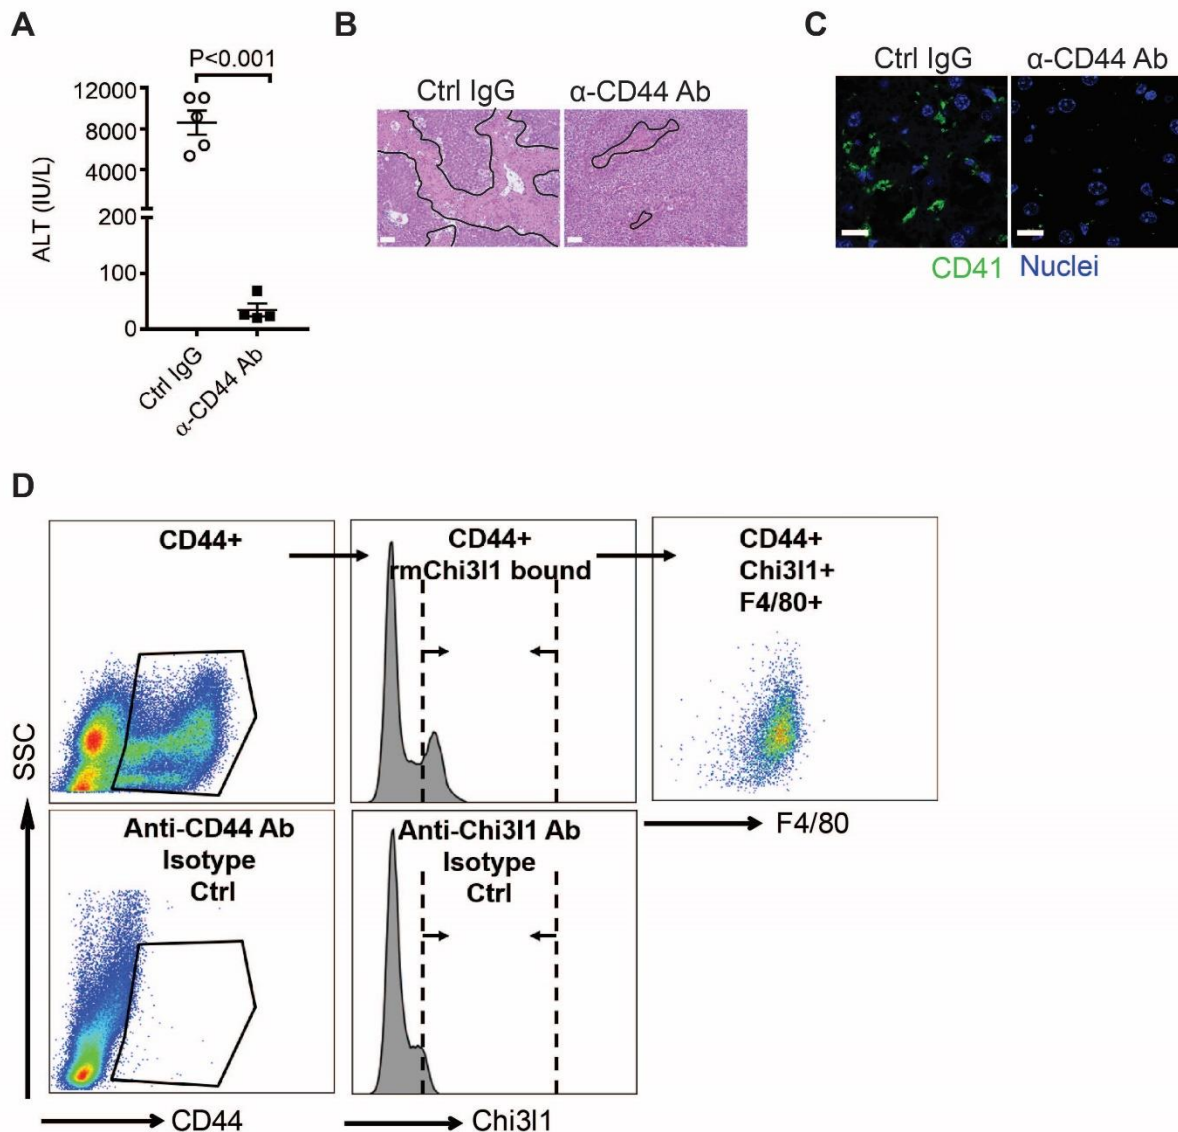

874  
875 **Supplementary Figure 2. Chi3l1 promotes hepatic platelet recruitment and ALI through**  
876 **CD44 expressing on Mφs. (A-C)** Chi3l1<sup>-/-</sup> mice reconstituted with rmChi3l1 were treated with  
877 either Ctrl IgG or α-CD44 Ab 30 min prior to APAP challenge. **(A)** Serum levels of ALT and **(B)**  
878 liver histology with necrotic areas outlined were evaluated 24hrs after APAP treatment (n=4-5  
879 mice/group). Scale bar, 250μm. **(C)** IF staining was performed to detect intrahepatic platelets  
880 (CD41<sup>+</sup>) 3hrs after APAP treatment (n=3 mice/group). Scale bar, 25μm. Two-tailed, unpaired  
881 student t-test was performed in **A**. **(D)** Flow cytometry analysis was performed to identify Chi3l1-  
882 binding cells among liver non-parenchymal cells (NPCs) isolated from WT mice treated with  
883 APAP for 2hrs. CD44<sup>+</sup> cells were gated from single live cells. CD44<sup>+</sup> cells that bind to rmChi3l1  
884 were further gated. The Chi3l1<sup>+</sup>CD44<sup>+</sup> cells were then identified by markers for various cell  
885 types, including CD45<sup>+</sup> CD146<sup>+</sup>F4/80<sup>+</sup> (Mφs), CD45<sup>+</sup>CD146<sup>+</sup>(LSECs) and Ly6G<sup>+</sup>(neutrophils).  
886

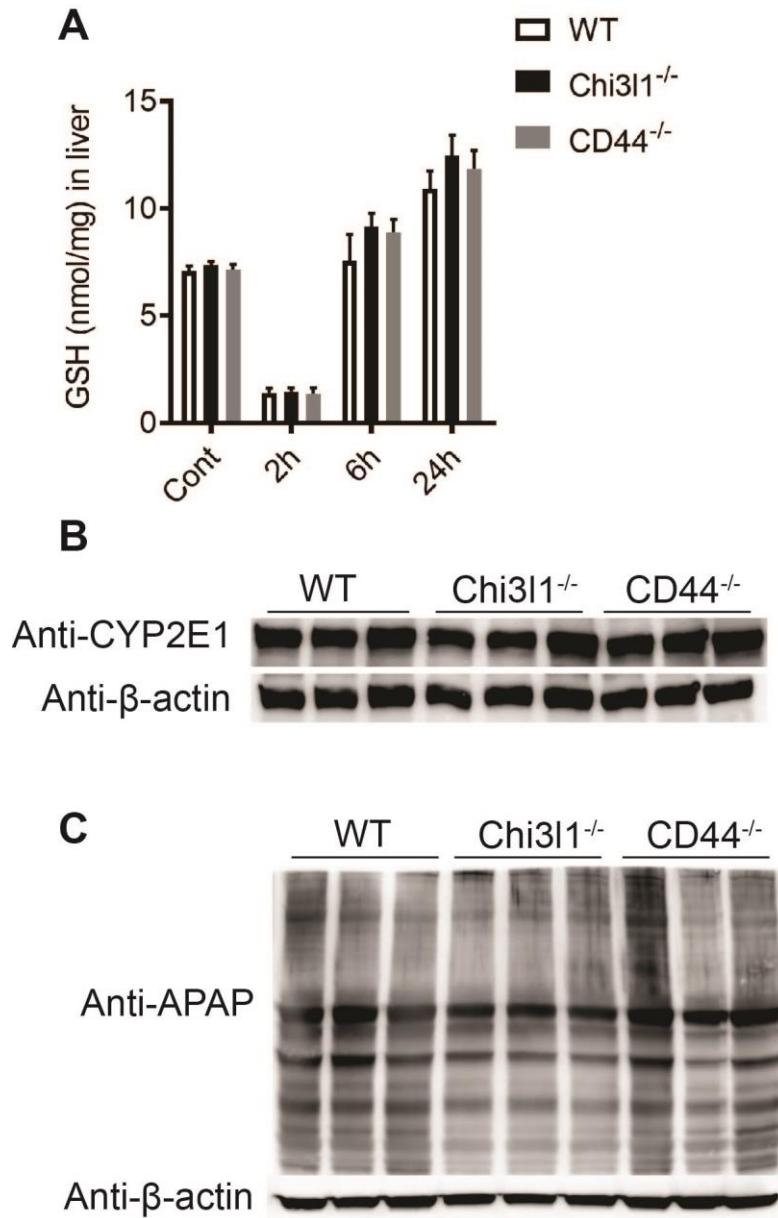

887  
888  
889  
890  
891  
892  
893  
894  
895  
896  
897

**Supplementary Figure 3. Deletion of Chi311- nor CD44 affects APAP bio-activation.** Male C57B/6 mice were treated with APAP (n= 3 mice/group). (A) GSH levels in the liver were measured at indicated time points by HPLC. (B) Hepatic protein levels of CYP2E1 were measured by Western blotting after mice were fasted overnight without APAP treatment. (C) NAPQI-protein adducts in liver were measured by Western blotting 2hrs after APAP treatment.

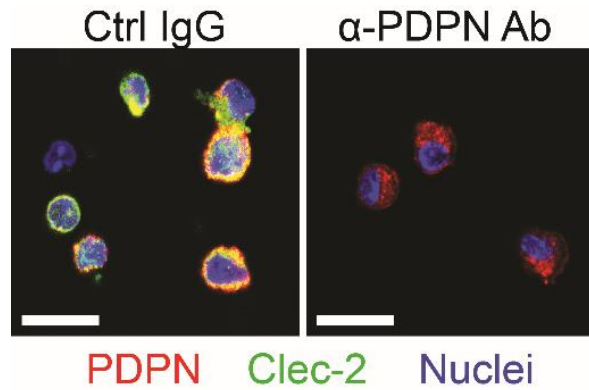

898  
899  
900  
901  
902  
903  
904  
905  
906

**Supplementary Figure 4. Podoplanin expressing on Mφs mediates interactions with platelets.** Mφs were isolated from WT mice treated with APAP for 3hrs. The cells were treated *in vitro* with either control IgG (Ctrl IgG) or an anti-podoplanin antibody (α-PDPN Ab) before incubation with platelets. IF staining was performed to detect PDPN on Mφs and Clec-2 on platelets. Scale bar, 25μm.

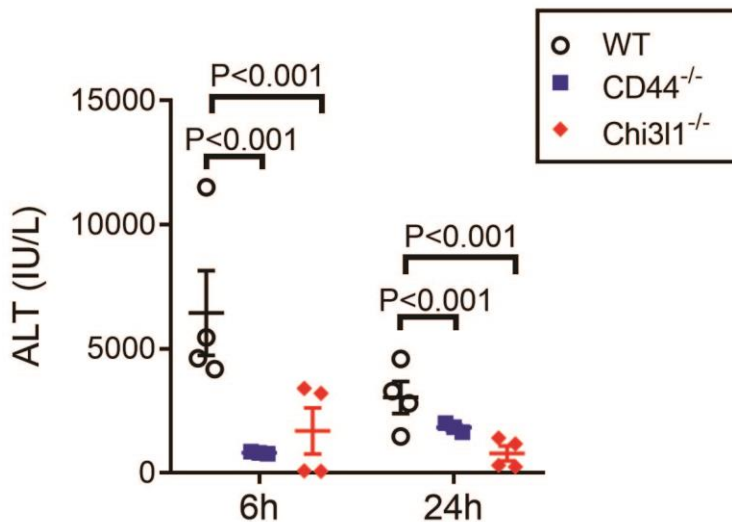

907  
908  
909  
910  
911  
912  
913  
914  
915  
916  
917  
918  
919  
920

**Supplementary Figure 5. Female Chi311<sup>-/-</sup> and CD44<sup>-/-</sup> mice develop reduced liver injury compared to female WT mice.** Female WT, Chi311<sup>-/-</sup> and CD44<sup>-/-</sup> mice were treated with APAP. Serum ALT levels were measured at 6hrs and 24hrs after APAP treatment (n=6-8 mice/group). One-way ANOVA was performed.
